# Supplementary material for: Global dissemination of npmA mediated pan-aminoglycoside resistance via a novel mobile genetic element in Gram-positive bacteria
Source: Research Square preprint supplement (doi:10.21203/rs.3.rs-4394742/v1), 2024-05-15
Supplement: Supplementary file 1 [file 473f0d26c5c8b6874624b540.xlsx]

## Sheet: npmA-carrying genomes
BioSample/EnteroBase_ID	Strain	Organism	MLST	Ribotype	npmA_variant	Niche	Host	Isolation_source	Collection_year	Collection_month	Collection_day	Continent	Country	Region	District	City	BioProject	Run	Study_id	contig_number	genome_length	N50	QC_assemblies
CLO_DA1493AA_AS	CD-18-00512	C. difficile	11	78	npmA2							Europe	Germany						no_study	100	4019800	96017	pass
CLO_EA6001AA_AS	SIRN_SA-019	C. difficile	11	78	npmA2	Human	Human		2014			Europe	United Kingdom	Scotland					no_study	52	3919880	162798	pass
CLO_FA2486AA_AS	SMG-21-1546	C. difficile	11	78	npmA2	Human	Human		2021	8		Europe	United Kingdom	Scotland					no_study	64	3956033	159450	pass
CLO_FA2612AA_AS	SMG-21-1774	C. difficile	11	78	npmA2	Human	Human		2021	9		Europe	United Kingdom	Scotland					no_study	80	4103909	148374	pass
CLO_FA2621AA_AS	SMG-21-1789	C. difficile	11	78	npmA2	Human	Human		2021	9		Europe	United Kingdom	Scotland					no_study	60	3956497	147345	pass
CLO_FA2624AA_AS	SMG-21-1795	C. difficile	11	78	npmA2	Human	Human		2021	9		Europe	United Kingdom	Scotland					no_study	82	3957362	132852	pass
CLO_FA3138AA_AS	SMG-21-2235	C. difficile	11	78	npmA2	Human	Human		2021	7		Europe	United Kingdom	Scotland					no_study	68	3956612	147343	pass
CLO_FA3263AA_AS	SMG-21-2287	C. difficile	11	78	npmA2	Human	Human		2021	12		Europe	United Kingdom	Scotland					no_study	70	4132735	140881	pass
CLO_FA3273AA_AS	SMG-21-2327	C. difficile	11	78	npmA2	Human	Human		2021	12		Europe	United Kingdom	Scotland					no_study	72	3957197	134068	pass
CLO_FA3417AA_AS	SMG-22-103	C. difficile	11	78	npmA2	Human	Human		2022	1		Europe	United Kingdom	Scotland					no_study	60	3963429	200044	pass
CLO_FA3491AA_AS	SMG-22-213	C. difficile	11	78	npmA2	Human	Human		2022	2		Europe	United Kingdom	Scotland					no_study	62	3955689	147338	pass
CLO_FA3530AA_AS	SMG-22-291	C. difficile	11		npmA2	Human	Human		2022	2		Europe	United Kingdom	Scotland					no_study	91	3966711	128844	pass
CLO_FA4355AA_AS	SMG-22-858	C. difficile	11		npmA2	Human	Human		2022	5		Europe	United Kingdom	Scotland					no_study	70	3956502	149040	pass
CLO_FA4375AA_AS	SMG-22-923	C. difficile	11		npmA2							Europe	United Kingdom	Scotland					no_study	90	3958650	126109	pass
CLO_FA5906AA_AS	SMG-22-1937	C. difficile	11		npmA2	Human	Human					Europe	United Kingdom	Scotland					no_study	75	3999185	159211	pass
CLO_FA6389AA_AS	SMG-22-2337	C. difficile	11		npmA2	Human	Human					Europe	United Kingdom	Scotland					no_study	75	3996803	147346	pass
CLO_FA6390AA_AS	SMG-22-2323	C. difficile	11		npmA2	Human	Human					Europe	United Kingdom	Scotland					no_study	66	3998847	147346	pass
CLO_FA6955AA_AS	CD10	C. difficile	11		npmA2	Environment	Animal-related		2021	12		Europe	Germany						no_study	136	3930588	55436	pass
SAMEA1402383	lsh04	C. difficile	13	78	npmA2							Oceania	Australia				PRJEB2101	ERS080209	no_study	76	4259183	166487	pass
SAMEA1710313	78	C. difficile	11	78	npmA2	Human	Human		2011			Europe	United Kingdom	Dudley			PRJEB3012	ERR256909	Knetsch2014	106	3942607	148130	pass
SAMEA1710497	78	C. difficile	11		npmA2	Human	Human		2009			Europe	United Kingdom	Derbyshire			PRJEB3012	ERR247128	Knetsch2014	71	3935596	121273	pass
SAMEA1710827	649	C. difficile	11		npmA2	Livestock	Pig		2001			North America	United States	Iowa			PRJEB3012		Knetsch2014	64	3890026	140761	pass
SAMEA2239719	C00010637	C. difficile	11		npmA2	Human	Human					Europe	United Kingdom				PRJEB4639	ERR347540	Numberger2019	78	3996528	147963	pass
SAMEA2240527	C00007709	C. difficile	11	49	npmA2	Human	Human					Europe	United Kingdom				PRJEB4640	ERR347803	Eyre2013	76	4000277	134199	pass
SAMEA5846548	CD-18-00548	C. difficile	36	49	npmA2	Livestock	Pig	rectal swab	2012			Europe	Germany				PRJEB33780	ERR3465678	Schneeberg2013	51	4392333	208948	pass
SAMEA5846551	CD-18-00541	C. difficile	36	49	npmA2	Livestock	Pig	rectal swab	2012			Europe	Germany				PRJEB33780	ERR3465718	Schneeberg2013	60	4389108	138388	pass
SAMEA5846552	CD-18-00538	C. difficile	36	49	npmA2	Livestock	Pig	rectal swab	2012			Europe	Germany				PRJEB33780	ERR3465752	Schneeberg2013	47	4388659	208964	pass
SAMEA5846554	CD-18-00536	C. difficile	36	598	npmA2	Livestock	Pig	rectal swab	2012			Europe	Germany				PRJEB33780	ERR3465746	Schneeberg2013	70	4393218	129441	pass
SAMEA5846555	CD-18-00533	C. difficile	161	78	npmA2	Livestock	Pig	rectal swab	2012			Europe	Germany	Lower Saxony			PRJEB33780	ERR3465769	Schneeberg2013	78	4061780	125921	pass
SAMEA5846557	CD-18-00530	C. difficile	11	598	npmA2	Livestock	Pig	Swine; rectal swab	2012			Europe	Germany				PRJEB33780	ERR3465796	Frentrup2020	76	4021348	120006	pass
SAMEA5846558	CD-18-00528	C. difficile	161	598	npmA2	Livestock	Pig	rectal swab	2012			Europe	Germany	Lower Saxony			PRJEB33780	ERR3465655	Schneeberg2013	74	4066753	125941	pass
SAMEA5846559	CD-18-00527	C. difficile	161	78	npmA2	Livestock	Pig	rectal swab	2012			Europe	Germany	Lower Saxony			PRJEB33780	ERR3465652	Schneeberg2013	85	4059712	102628	pass
SAMEA5846561	CD-18-00524	C. difficile	11	598	npmA2	Livestock	Pig	Swine; rectal swab	2012			Europe	Germany				PRJEB33780	ERR3465757	Frentrup2020	79	4019982	125636	pass
SAMEA5846562	CD-18-00520	C. difficile	161	598	npmA2	Livestock	Pig	rectal swab	2012			Europe	Germany	Lower Saxony			PRJEB33780	ERR3465788	Schneeberg2013	83	4065936	126233	pass
SAMEA5846563	CD-18-00519	C. difficile	161	78	npmA2	Livestock	Pig	rectal swab	2012			Europe	Germany	Lower Saxony			PRJEB33780	ERR3465629	Schneeberg2013	85	4060727	99725	pass
SAMEA5846564	CD-18-00518	C. difficile	11	78	npmA2	Livestock	Pig	Swine; rectal swab	2012			Europe	Germany				PRJEB33780	ERR3465641	Frentrup2020	91	4018747	95104	pass
SAMEA5846565	CD-18-00517	C. difficile	11	598	npmA2	Livestock	Pig	Swine; rectal swab	2012			Europe	Germany				PRJEB33780	ERR3465639	Frentrup2020	90	4018572	97479	pass
SAMEA5846566	CD-18-00516	C. difficile	161	598	npmA2	Livestock	Pig	rectal swab	2012			Europe	Germany	Lower Saxony			PRJEB33780	ERR3465638	Schneeberg2013	70	4067134	137399	pass
SAMEA5846567	CD-18-00515	C. difficile	161	78	npmA2	Livestock	Pig	rectal swab	2012			Europe	Germany	Lower Saxony			PRJEB33780	ERR3465662	Schneeberg2013	101	4059291	93738	pass
SAMEA5846568	CD-18-00514	C. difficile	11	598	npmA2	Livestock	Pig	Swine; rectal swab	2012			Europe	Germany				PRJEB33780	ERR3465659	Frentrup2020	70	4029009	128544	pass
SAMEA5846569	CD-18-00513	C. difficile	161		npmA2	Livestock	Pig	rectal swab	2012			Europe	Germany	Lower Saxony			PRJEB33780	ERR3465656	Schneeberg2013	71	4060625	127706	pass
SAMN02650258	7_10492	C. difficile	109		npmA2	Livestock	Pig	feces	2008	9	29	Oceania	Australia	NSW			PRJNA239265	SRS567761	Roy-Chowdhury2016	65	4280954	215081	pass
SAMN04458513	Symptomatic Infection 1297	C. difficile	11		npmA2	Human	Human	Homo sapiens; Faeces; feces	2011	6	9	Europe	United Kingdom	England	Oxfordshire		PRJNA304087	SRR3333350	Dingle2019	88	3978384	134205	pass
SAMN04459299	Symptomatic Infection 2557	C. difficile	11		npmA2	Human	Human	feces	2010	8	17	Europe	United Kingdom			Leeds	PRJNA304087	SRS1375765	Dingle2017	339	6245337	63942	fail
SAMN04459343	Symptomatic Infection 2601	C. difficile	11		npmA2	Human	Human	Homo sapiens; Faeces; feces	2011	10	5	Europe	United Kingdom	England		Leeds	PRJNA304087	SRR3335887	Dingle2019	86	4022943	140805	pass
SAMN04460609	Symptomatic Infection 3943	C. difficile	11		npmA2	Human	Human	Homo sapiens; Faeces; feces	2008	1	7	North America	United States				PRJNA304087	SRR3334084	Dingle2019	121	3985219	163571	pass
SAMN04848501	157/21	C. difficile	11	78	npmA2	Human	Human		2010	8	17	Europe	United Kingdom			Leeds	PRJNA317528	SRS1395866	Martin2018	346	6236746	60474	fail
SAMN06579267	ST11	C. difficile	11	78	npmA2	Human	Human	Homo sapiens; Faecal	2014	4	24	Europe	United Kingdom	Scotland	Glasgow City	Glasgow	PRJNA379066	SRR5365897	no_study	85	4002162	183395	pass
SAMN06579269	ST11	C. difficile	11	78	npmA2	Human	Human	Homo sapiens; Faecal	2014	4	24	Europe	United Kingdom	Scotland	Glasgow City	Glasgow	PRJNA379066	SRR5365895	no_study	78	3998810	195392	pass
SAMN06579274	ST11	C. difficile	11	78	npmA2	Human	Human	Homo sapiens; Faecal	2014	4	24	Europe	United Kingdom	Scotland	Glasgow City	Glasgow	PRJNA379066	SRR5365890	no_study	79	4002397	195235	pass
SAMN06675465	ST11	C. difficile	11	78	npmA2	Human	Human	Homo sapiens; Faecal	2014	4	24	Europe	United Kingdom	Scotland			PRJNA381384	SRR5410566	Dingle2019	75	4001248	190606	pass
SAMN06675468	ST11	C. difficile	11	78	npmA2	Human	Human	Homo sapiens; Faecal	2014	4	24	Europe	United Kingdom	Scotland			PRJNA381384	SRR5410563	Dingle2019	85	4002162	183395	pass
SAMN06675470	ST11	C. difficile	11	78	npmA2	Human	Human	Homo sapiens; Faecal	2014	4	24	Europe	United Kingdom	Scotland			PRJNA381384	SRR5410561	Dingle2019	78	3998810	195392	pass
SAMN06675476	ST11	C. difficile	11	78	npmA2	Human	Human	Homo sapiens; Faecal	2014	4	24	Europe	United Kingdom	Scotland			PRJNA381384	SRR5410555	Dingle2019	79	4002397	195235	pass
SAMN06675526	ST11	C. difficile	11	78	npmA2	Human	Human	Homo sapiens; Faecal	2014	4	24	Europe	United Kingdom	Scotland			PRJNA381384	SRR5410505	Dingle2019	82	3968392	163933	pass
SAMN06675534	ST11	C. difficile	11	78	npmA2	Human	Human	Homo sapiens; Faecal	2014	4	24	Europe	United Kingdom	Scotland			PRJNA381384	SRR5410497	Dingle2019	82	3996955	188950	pass
SAMN06675539	ST11	C. difficile	11	78	npmA2	Human	Human	Homo sapiens; Faecal	2014	4	24	Europe	United Kingdom	Scotland			PRJNA381384	SRR5410492	Dingle2019	71	3986105	164249	pass
SAMN06675551	ST11	C. difficile	11		npmA2	Human	Human	Homo sapiens; Faecal	2014	4	24	Europe	United Kingdom	Scotland			PRJNA381384	SRR5410480	Dingle2019	82	3949199	188907	pass
SAMN07609404	NA	C. difficile	11		npmA2	Human	Human	Homo sapiens; clinical sample	2014	2	12	Europe	United Kingdom				PRJNA369188	SRR6009155	Eyre2017	109	3983739	145227	pass
SAMN08915596	WCHCD000079	C. difficile	54		npmA2	Human	Human	Homo sapiens	2016			Asia	China	Sichuan			PRJNA449640	SRR6986153	Chen2017	88	4342270	280386	pass
SAMN11285010	CD08165	C. difficile	11		npmA2	Human	Human	stool	2018			North America	United States	Pittsburgh	Pennsylvania		PRJNA475751	SRS4553120	Evans2022	252	4100474	28850	fail
SAMN15907586	M2017012854	C. difficile	11		npmA2	Human	Human	stool	2017	7	29	North America	United States	Minnesota	Benton County		PRJNA659471	SRS7261093	Pecora2022	209	4112739	37499	fail
SAMN17378013		C. difficile	11		npmA2	Wildlife	Wild boar	farm sample	2015	5	1	Europe	Ireland				PRJNA692997	SRS8072770	Moloney2021	374	3873525	20833	fail
SAMN19130042	HS-FS-000416-I-02	C. difficile	54		npmA2	Human	Human	Homo sapiens; feces	2018	6	29	North America	United States	Arizona			PRJNA728705	SRR14526326	Williamson2023	78	4362363	303136	pass
SAMN20110357	2021EL-00742	C. difficile	11		npmA2	Human	Human	stool	2017			North America	United States				PRJNA629351	SRS9421802	Gargis2023	320	4127920	23070	fail
SAMN22636055	192636823	C. difficile	11		npmA2	Human	Human		2019	7	25	Asia	China				PRJNA686004		Wen2022	46	4005033	165500	pass
SAMN25516586	RT78	C. difficile	11		npmA2	Human	Human	Homo sapiens; Human infection				Europe	United Kingdom				PRJNA762697	SRR17631097	Moore2022	52	3962612	181671	pass
SAMN25516701	RT78	C. difficile	11		npmA2	Human	Human	Homo sapiens; Human infection				Europe	United Kingdom				PRJNA762697	SRR17631379	Moore2022	52	3964375	194716	pass
SAMN25516703	RT78	C. difficile	11		npmA2	Human	Human	Homo sapiens; Human infection				Europe	United Kingdom				PRJNA762697	SRR17631381	Moore2022	56	3961075	163571	pass
SAMN25516759	RT78	C. difficile	11		npmA2	Human	Human	Homo sapiens; Human infection	2015	11	8	Europe	United Kingdom				PRJNA762697	SRR17631102	Moore2022	129	3935997	72591	pass
SAMN25516791	RT78	C. difficile	11		npmA2	Human	Human	Homo sapiens; Human infection	2016	2	5	Europe	United Kingdom				PRJNA762697	SRR17631413	Moore2022	104	3958458	121383	pass
SAMN25516856	RT78	C. difficile	11		npmA2	Human	Human	Homo sapiens; Human infection				Europe	United Kingdom				PRJNA762697	SRR17631143	Moore2022	51	3962807	192864	pass
SAMN25516892	RT78	C. difficile	11		npmA2	Human	Human	Homo sapiens; Human infection				Europe	United Kingdom				PRJNA762697	SRR17631318	Moore2022	48	3915894	211900	pass
SAMN25516938	RT78	C. difficile	11		npmA2	Human	Human	Homo sapiens; Human infection				Europe	United Kingdom				PRJNA762697	SRR17631448	Moore2022	46	3954092	229712	pass
SAMN25516973	RT78	C. difficile	11		npmA2	Human	Human	Homo sapiens; Human infection				Europe	United Kingdom				PRJNA762697	SRR17631343	Moore2022	61	3960517	162796	pass
SAMN25516990	RT78	C. difficile	11		npmA2	Human	Human	Homo sapiens; Human infection				Europe	United Kingdom				PRJNA762697	SRR17631165	Moore2022	50	3930705	163571	pass
SAMN29256601	NA	C. difficile	11		npmA2	Human	Human	Homo sapiens; clinical sample	2010	5	10	Europe	United Kingdom				PRJNA318370	SRR19789563	Stoesser2017	58	3954755	134081	pass
SAMN29614005	2022EL-00667	C. difficile	11		npmA2	Human	Human	Homo sapiens; stool	2020			North America	United States				PRJNA629351	SRR20063646	Gargis2023	86	4370406	163571	pass
SAMN31426476	2022EL-00914	C. difficile	11		npmA2	Human	Human	Homo sapiens; stool	2020			North America	United States				PRJNA629351	SRR22020516	Gargis2023	76	4079793	163571	pass
SAMN31945704	3632	C. difficile	11		npmA2	Human	Human		2021	6	8	Europe	United Kingdom				PRJNA907009		no_study	182	4026702	201956	pass
SAMN33341108	2023EL-00053	C. difficile	54		npmA2	Human	Human	Homo sapiens; stool	2021			North America	United States				PRJNA629351	SRR23510847	Gargis2023	87	4366105	227667	pass
SAMN33341169	2023EL-00114	C. difficile	54		npmA2	Human	Human	Homo sapiens; stool	2021			North America	United States				PRJNA629351	SRR23510812	Gargis2023	91	4369772	262029	pass
SAMN34409465	2023EL-00216	C. difficile	54		npmA2	Human	Human	Homo sapiens; stool	2019			North America	United States				PRJNA629351	SRR24326534	Gargis2023	100	4369971	261833	pass
SAMN34409487	2023EL-00238	C. difficile	54		npmA2	Human	Human	Homo sapiens; stool	2019			North America	United States				PRJNA629351	SRR24326509	Gargis2023	110	4368915	226944	pass
SAMN35987594	2023EL-00669	C. difficile	11		npmA2	Human	Human	Homo sapiens; stool	2021			North America	United States				PRJNA629351	SRR25024037	Gargis2023	72	4089278	162797	pass
SAMN37183764	2023EL-00847	C. difficile	11		npmA2	Human	Human	Homo sapiens; stool	2021			North America	United States				PRJNA629351	SRR25778919	Gargis2023	72	4081069	162796	pass
SAMN37183772	2023EL-00856	C. difficile	54		npmA2	Human	Human	Homo sapiens; stool	2021			North America	United States				PRJNA629351	SRR25778911	Gargis2023	101	4370399	298362	pass
SAMN37224098	CF82	C. difficile	11		npmA2	Environment	Environment	environmental sample	2021			Europe	Germany				PRJNA1011814		Blau2023	6	4106062	4016009	pass
SAMN37224100	CF84	C. difficile	11		npmA2	Environment	Environment	environmental sample	2021			Europe	Germany				PRJNA1011814		Blau2023	2	4073728	3841893	pass
SAMN37224101	CF85	C. difficile	11		npmA2	Environment	Environment	environmental sample	2021			Europe	Germany				PRJNA1011814		Blau2023	5	4084188	4011181	pass
SAMN37224103	CF87	C. difficile	11		npmA2	Environment	Environment	environmental sample	2021			Europe	Germany				PRJNA1011814		Blau2023	3	4078612	3236401	pass
SAMN37224108	CF95	C. difficile	11		npmA2	Environment	Environment	environmental sample	2021			Europe	Germany				PRJNA1011814		Blau2023	3	4053907	4031448	pass
SAMN37224109	CF99	C. difficile	11		npmA2	Environment	Environment	environmental sample	2021			Europe	Germany				PRJNA1011814		Blau2023	4	4083590	4018753	pass
SAMN37224131	CF97	C. difficile	11		npmA2	Environment	Environment	environmental sample	2021			Europe	Germany				PRJNA1011814		Blau2023	4	4091827	2270211	pass
SAMN37224198	CF200	C. difficile	11	78	npmA2	Environment	Environment	environmental sample	2021			Europe	Germany				PRJNA1011814		Blau2023	4	4075860	3747232	pass
SAMEA110473739	SAT16-59	C. difficile	11		npmA1	Human	Human	feces	2016			Europe	France				PRJEB54703	ERS12571431	Courbin2022	61	4081810	174092	pass
CLO_DA8296AA_AS	CD-19-00473	C. difficile	11		npmA1							Europe	Germany						no_study	73	4141025	141173	pass
CLO_DA8295AA_AS	CD-19-00472	C. difficile	11		npmA1							Europe	Germany						no_study	72	4139205	136166	pass
CLO_DA8294AA_AS	CD-19-00471	C. difficile	11		npmA1							Europe	Germany						no_study	63	4134315	153395	pass
SAMN14265979	CD07814	C. difficile	11		npmA1	Human	Human	stool	2017			North America	United States	Pittsburgh	Pennsylvania		PRJNA609916		Evans2020	6	4226733	4180658	pass
SAMN05209145	TVR-003	C. difficile	54		npmA1	Human	Human	clinical sample				Oceania	Australia				PRJNA318370	SRS1486003	Stoesser2017	59	4277756	214074	pass
SAMEA4885232	E7474	E. faecium	18		npmA2	Human	Human	stool	2012			Europe	Netherlands	Amsterdam			PRJEB28495	ERS2704235	Arredondo-Alonso2020	163	2939266	80010	pass
SAMEA4885233	E7475	E. faecium	18		npmA2	Human	Human	stool	2012			Europe	Netherlands	Amsterdam			PRJEB28495	ERS2704236	Arredondo-Alonso2020	165	2939588	66558	pass

## Sheet: Contextual C. difficile genomes
BioSample/EnteroBase_ID	Strain	MLST	Ribotype	npmA_variant	Niche	Host	Isolation_source	Collection_year	Collection_month	Collection_day	Continent	Country	Region	District	City	BioProject	Run	Study_id	contig_number	genome_length	N50	QC_assemblies
SAMEA3374973	VRECD0003	11			Human	Human	Homo sapiens; human	2014			Europe	United Kingdom				PRJEB8767	ERR1024372	no_study	52	4105252	219704	pass
SAMEA2769949	SJH_89	11			Human	Human		2012			Europe	Ireland			Dublin	PRJEB6575	ERR605004	Aogáin2015	89	3970174	164177	pass
SAMEA2769950	SJH_72	11			Human	Human		2012			Europe	Ireland			Dublin	PRJEB6575	ERR605005	Aogáin2015	115	3970571	152494	pass
SAMEA3871172	8378	11														PRJEB12715	ERR1256647	no_study	93	4127509	152910	pass
SAMN04101437	CDILTC-0426	11			Human	Human	Homo sapiens; stool	2013			North America	United States	Ohio			PRJNA296517	SRR2915768	Donskey2018	146	4033320	99715	pass
SAMEA2239352	CD01	11			Environment	Water/River	not appicable; wastewater	2014			Europe	United Kingdom				PRJEB4347	ERR425928	Shishir2019	60	4032430	141498	pass
SAMEA2187570	C00008096	11			Human	Human		2011			Europe	United Kingdom				PRJEB4556	ERR340168	Dubois2016	67	4031010	141793	pass
SAMEA2187561	C00008084	11			Human	Human		2011			Europe	United Kingdom				PRJEB4556	ERR340159	Dubois2016	82	4036903	134407	pass
SAMEA2187720	C00010636	11			Human	Human		2010			Europe	United Kingdom				PRJEB4556	ERR340318	Dubois2016	74	3914313	141070	pass
SAMEA2187694	C00009926	11			Human	Human		2008			Europe	United Kingdom				PRJEB4556	ERR340292	Dubois2016	75	3915331	129498	pass
SAMEA2187638	C00008291	11			Human	Human		2011			Europe	United Kingdom				PRJEB4556	ERR340236	Dubois2016	80	4031208	134013	pass
SAMEA1571199	C00001540	11			Human	Human		2006	9	20	Europe	United Kingdom		Oxfordshire		PRJEB3093	ERR142248	Didelot2012	242	3987010	38363	fail
SAMEA2240527	C00007709	11		npmA2	Human	Human					Europe	United Kingdom				PRJEB4640	ERR347803	Eyre2013	76	4000277	134199	pass
SAMEA2240660	C00008449	11			Human	Human					Europe	United Kingdom				PRJEB4640	ERR347620	Eyre2013	107	3954289	88805	pass
SAMEA1487079	C00002387	11	193		Human	Human		2006	10	19	Europe	United Kingdom				PRJEB3010	ERR126271	Dingle2012	202	4030769	53549	fail
SAMEA1710411	SLO008	11									Europe	Belgium				PRJEB3012	ERR257015	Knetsch2014	50	4037643	163924	pass
SAMEA1710753	B37_3	11			Livestock	Pig	feces; Pig	2011			Europe	Netherlands				PRJEB3012	ERR257067	Knetsch2014	94	3918457	134740	pass
SAMEA1710627	H214	11			Human	Human	feces; Homo sapiens	2011			Europe	Netherlands				PRJEB3012	ERR257059	Knetsch2014	106	3916840	134187	pass
SAMEA1710576	H95	11			Human	Human	feces; Homo sapiens	2011			Europe	Netherlands				PRJEB3012	ERR257057	Knetsch2014	114	4021530	131270	pass
SAMEA1710567	H122	11			Human	Human	feces; Homo sapiens	2011			Europe	Netherlands				PRJEB3012	ERR257056	Knetsch2014	91	3905177	147397	pass
SAMEA1710718	B15_1	11			Livestock	Pig	feces; Pig	2011			Europe	Netherlands				PRJEB3012	ERR257053	Knetsch2014	101	4024600	132821	pass
SAMEA1710362	SLO015	11									Europe	Belgium				PRJEB3012		Knetsch2014	68	4124661	133938	pass
SAMEA1710348	SLO014	11									Europe	Belgium				PRJEB3012	ERR257021	Knetsch2014	62	4080514	162947	pass
SAMEA1710316	SLO012	11									Europe	Belgium				PRJEB3012		Knetsch2014	61	4119486	147987	pass
SAMEA1710560	SLO011	11									Europe	Belgium				PRJEB3012		Knetsch2014	56	4124410	147862	pass
SAMEA1710539	81	11	78		Human	Human		2008			Europe	United Kingdom	Leeds			PRJEB3012	ERR257085	Knetsch2014	95	3905366	142417	pass
SAMEA1710680	H205	11			Human	Human	feces; Homo sapiens	2011			Europe	Netherlands				PRJEB3012	ERR257052	Knetsch2014	95	3915366	141597	pass
SAMEA1710506	78	11	78		Human	Human		2012			Europe	Austria	Styria			PRJEB3012	ERR257007	Knetsch2014	50	4008419	162644	pass
SAMEA1710492	78	11	78		Human	Human		2012			Europe	Austria	Tyrol			PRJEB3012		Knetsch2014	57	4015643	149591	pass
SAMEA1710543	78	11	78		Human	Human		2012			Europe	Austria	Vienna			PRJEB3012	ERR257005	Knetsch2014	60	4085182	130378	pass
SAMEA1710347	78	11	78		Human	Human		2011			Europe	United Kingdom	Birmingham			PRJEB3012	ERR256907	Knetsch2014	101	3951968	134081	pass
SAMEA1710381	78	11	78		Human	Human		2011			Europe	United Kingdom	Northants			PRJEB3012	ERR256903	Knetsch2014	97	3907002	147652	pass
SAMEA1710750	BIR045	11									Europe	United Kingdom				PRJEB3012	ERR256921	Knetsch2014	60	4027378	147261	pass
SAMEA1710758	BIR042	11									Europe	United Kingdom				PRJEB3012	ERR256918	Knetsch2014	49	4025029	163700	pass
SAMEA1710547	78	11	78		Human	Human		2010			Europe	United Kingdom	Nottinghamshire			PRJEB3012	ERR256896	Knetsch2014	122	3935210	140805	pass
SAMEA1710507	78	11	78		Human	Human		2010			Europe	United Kingdom	Shrewsbury			PRJEB3012	ERR256894	Knetsch2014	102	3877918	141153	pass
SAMEA1710313	78	11	78	npmA2	Human	Human		2011			Europe	United Kingdom	Dudley			PRJEB3012	ERR256909	Knetsch2014	106	3942607	148130	pass
SAMEA1710443	78	11	78		Human	Human		2011			Europe	United Kingdom	Northants			PRJEB3012	ERR256898	Knetsch2014	102	3903724	141540	pass
SAMEA1710434	78	11	78		Human	Human		2011			Europe	United Kingdom	Shrewsbury			PRJEB3012	ERR256899	Knetsch2014	107	3871569	140899	pass
SAMEA1710461	078NET005	11	78		Human	Human		2009			Europe	Austria	Feldkirch			PRJEB3012		Knetsch2014	105	3982029	140781	pass
SAMEA1710429	078NET002	11	78		Human	Human		2006			Oceania	Australia	Perth			PRJEB3012		Knetsch2014	80	4074605	140997	pass
SAMEA1710424	078GUE010	11	78		Human	Human		2004			North America	Canada	NI			PRJEB3012	ERR171379	Knetsch2014	71	3929500	140790	pass
SAMEA1710467	078GUE009	11	78		Human	Human		2004			North America	Canada	NI			PRJEB3012		Knetsch2014	70	3838560	140846	pass
SAMEA1710511	078GUE007	11	78		Human	Human		2011			Asia	Iran	NI			PRJEB3012	ERR171376	Knetsch2014	80	4042855	119883	pass
SAMEA1710562	078GUE005	11									Asia	Iran				PRJEB3012	ERR171374	Knetsch2014	63	3835328	140846	pass
SAMEA1710754	078GUE003	11	78		Human	Human		2005			North America	Canada	NI			PRJEB3012		Knetsch2014	70	4002402	140841	pass
SAMEA1710772	078GUE002	11	78		Human	Human		2005			North America	Canada	NI			PRJEB3012	ERR171371	Knetsch2014	81	3876956	140781	pass
SAMEA1710756	078NET069	11			Livestock	Pig	Pig; feces	2009			Europe	Netherlands				PRJEB3012		Knetsch2014	93	3866941	119868	pass
SAMEA1710317	078NET068	11			Livestock	Pig	Pig; feces	2009			Europe	Netherlands				PRJEB3012	ERR171352	Knetsch2014	93	3869255	119907	pass
SAMEA1710375	078NET064	11			Livestock	Pig	Pig; feces	2009			Europe	Netherlands				PRJEB3012	ERR171348	Knetsch2014	95	3940558	104014	pass
SAMEA1710371	078NET063	11			Livestock	Pig	Pig; feces	2009			Europe	Netherlands				PRJEB3012		Knetsch2014	93	3941533	104373	pass
SAMEA1710328	078NET049	11			Human	Human	Homo sapiens; feces	2009			Europe	Netherlands				PRJEB3012	ERR171334	Knetsch2014	72	4082329	133662	pass
SAMEA1710390	078NET043	11			Human	Human	Homo sapiens; feces	2009			Europe	Netherlands				PRJEB3012	ERR171328	Knetsch2014	98	4083592	119835	pass
SAMEA1710404	078NET042	11			Human	Human	Homo sapiens; feces	2009			Europe	Netherlands				PRJEB3012		Knetsch2014	68	3833188	140732	pass
SAMEA1710797	078NET036	11			Human	Human	Homo sapiens; feces	2008			Europe	Netherlands				PRJEB3012		Knetsch2014	64	3959776	163371	pass
SAMEA1710800	078NET035	11			Human	Human	Homo sapiens; feces	2008			Europe	Netherlands				PRJEB3012	ERR171320	Knetsch2014	91	4011475	141303	pass
SAMEA1710778	078NET030	11			Human	Human	Homo sapiens; feces	2007			Europe	Netherlands				PRJEB3012	ERR171315	Knetsch2014	72	3876673	140787	pass
SAMEA1710794	078NET029	11			Human	Human	Homo sapiens; feces	2007			Europe	Netherlands				PRJEB3012	ERR171314	Knetsch2014	73	3992912	140777	pass
SAMEA1710773	078NET028	11			Human	Human	Homo sapiens; feces	2007			Europe	Netherlands				PRJEB3012	ERR171313	Knetsch2014	67	3871749	141336	pass
SAMEA1710485	078NET017	11	78		Human	Human		2008			Europe	United Kingdom	Leeds			PRJEB3012	ERR171302	Knetsch2014	74	3897615	130473	pass
SAMEA1710517	078NET016	11									Europe	United Kingdom				PRJEB3012		Knetsch2014	197	4003301	147254	pass
SAMEA1710558	078NET014	11	78		Human	Human		2009			Europe	Ireland	Dublin			PRJEB3012	ERR171299	Knetsch2014	73	3943131	140792	pass
SAMEA1710531	078NET055	11	78		Human	Human		2009			Europe	United Kingdom	Glasgow			PRJEB3012		Knetsch2014	67	3939525	140789	pass
SAMEA1710620	78	11	78		Human	Human		2009			Europe	United Kingdom	Worcestershire			PRJEB3012		Knetsch2014	61	3887548	125490	pass
SAMEA1710497	78	11	78	npmA2	Human	Human		2009			Europe	United Kingdom	Derbyshire			PRJEB3012	ERR247128	Knetsch2014	71	3935596	121273	pass
SAMEA1710516	78	11	78		Human	Human		2008			Europe	United Kingdom	Nottinghamshire			PRJEB3012		Knetsch2014	66	3825363	133714	pass
SAMEA1710742	78	11	78		Human	Human		2008			Europe	United Kingdom	Dudley			PRJEB3012		Knetsch2014	58	3933567	133694	pass
SAMEA1710780	78	11	78		Human	Human		2006			North America	United States	Iowa			PRJEB3012		Knetsch2014	65	3851683	130330	pass
SAMEA1710522	MON017	11									Oceania	Australia				PRJEB3012		Knetsch2014	66	4015337	133664	pass
SAMEA1710632	78	11	78		Livestock	Cow		2006			North America	United States	Iowa			PRJEB3012		Knetsch2014	54	3893246	140804	pass
SAMEA1710591	78	11	78		Livestock	Pig		2002			North America	United States	Iowa			PRJEB3012	ERR247048	Knetsch2014	51	3988367	140804	pass
SAMEA1710757	078LVP025	11	78		Human	Human		2011			Europe	United Kingdom	Liverpool			PRJEB3012		Knetsch2014	77	4031947	128929	pass
SAMEA1710593	078LVP020	11	78		Human	Human		2010			Europe	United Kingdom	Liverpool			PRJEB3012		Knetsch2014	61	3889673	141380	pass
SAMEA1710660	078LVP016	11	78		Human	Human		2010			Europe	United Kingdom	Liverpool			PRJEB3012	ERR171236	Knetsch2014	65	3909880	147254	pass
SAMEA1710693	078LVP015	11	78		Human	Human		2010			Europe	United Kingdom	Liverpool			PRJEB3012		Knetsch2014	66	3851189	141854	pass
SAMEA1710781	078LVP013	11	78		Human	Human		2010			Europe	United Kingdom	Liverpool			PRJEB3012	ERR171233	Knetsch2014	62	3876660	141739	pass
SAMEA1710790	078LVP012	11	78		Human	Human		2010			Europe	United Kingdom	Liverpool			PRJEB3012	ERR171232	Knetsch2014	66	3868100	140787	pass
SAMEA1710545	078LVP009	11	78		Human	Human		2010			Europe	United Kingdom	Liverpool			PRJEB3012	ERR171229	Knetsch2014	65	3871238	140777	pass
SAMEA1710419	078GUE041	11	78		Food	Avian	Chicken_thigh	2008			North America	Canada	NI			PRJEB3012	ERR171218	Knetsch2014	71	3834714	140781	pass
SAMEA1710380	078GUE038	11	78		Food	Avian	Chicken_thigh	2008			North America	Canada	NI			PRJEB3012		Knetsch2014	63	3840168	140787	pass
SAMEA1710345	078GUE037	11									North America	Canada				PRJEB3012		Knetsch2014	57	3840284	147881	pass
SAMEA1710321	078GUE035	11									North America	Canada				PRJEB3012	ERR171212	Knetsch2014	68	3844724	141942	pass
SAMEA1710340	078GUE034	11	78		Companion Animal	Equine		2010			North America	Canada	NI			PRJEB3012	ERR171211	Knetsch2014	65	3845395	141880	pass
SAMEA1710549	078GUE031	11	78		Livestock	Cow		2004			North America	Canada	NI			PRJEB3012		Knetsch2014	71	3846505	140802	pass
SAMEA1710386	078GUE024	11									North America	Canada				PRJEB3012		Knetsch2014	63	3837180	140783	pass
SAMEA1710581	078GUE022	11									North America	Canada				PRJEB3012		Knetsch2014	62	3839651	140794	pass
SAMEA1710654	078GUE020	11									North America	Canada				PRJEB3012	ERR171197	Knetsch2014	70	3844234	141763	pass
SAMEA1710444	078GUE014	11	78		Human	Human		2011			North America	Canada	NI			PRJEB3012	ERR171191	Knetsch2014	61	3841065	140792	pass
CLO_AA7075AA_AS	CD-16-00082	11	126		Human	Human					Europe	Germany						no_study	90	4101079	133968	pass
SAMEA1468420	C00007256	11			Human	Human		2011			Europe	United Kingdom				PRJEB3006	ERR127440	Eyre2012	110	3891996	134301	pass
SAMEA742890	90374	11	78		Human	Human		2009			Europe	United Kingdom	Belfast			PRJEB2103	ERR027340	no_study	70	3867971	103201	pass
SAMEA742896	90099	11	78		Human	Human		2009			Europe	United Kingdom	Belfast			PRJEB2103		no_study	62	3873315	119940	pass
SAMEA742888	90372	11	78		Human	Human		2009			Europe	United Kingdom	Belfast			PRJEB2103	ERR027345	no_study	84	3871356	79257	pass
SAMEA742901	90571	11	78		Human	Human		2009			Europe	United Kingdom	Belfast			PRJEB2103	ERR027346	no_study	201	3877374	37538	fail
SAMEA742871	90652	11	78		Human	Human		2009			Europe	United Kingdom	Belfast			PRJEB2103	ERR027354	no_study	109	3865859	61345	pass
SAMEA742870	90482	11	78		Human	Human		2009			Europe	United Kingdom	Belfast			PRJEB2103		no_study	64	3863124	115103	pass
SAMEA742868	90021	11	78		Human	Human		2009			Europe	United Kingdom	Belfast			PRJEB2103		no_study	160	3869025	41644	pass
SAMEA742878	90468	11	78		Human	Human		2009			Europe	United Kingdom	Belfast			PRJEB2103		no_study	55	3875479	147302	pass
SAMN02904068	6058625	11	126		Environment	Environment	Hospital Environment	1996			Europe	Poland				PRJNA248340	SRR1519437	Knetsch2012	82	4158550	175618	pass
SAMEA2239719	C00010637	11		npmA2	Human	Human					Europe	United Kingdom				PRJEB4639	ERR347540	Numberger2019	78	3996528	147963	pass
CLO_BA0308AA_AS	DSM29650	11																no_study	1	3931260	3931260	pass
SAMEA4505347	f19d5400-8fae-11e6-95da-3c4a9275d6c8	11			Human	Human		2015			North America	United States				PRJEB17618	ERR1853179	no_study	104	4119680	139393	pass
CLO_BA1560AA_AS	CD-17-00028	11	126		Human	Human	faeces	2015			Europe	Spain						no_study	104	4074328	133687	pass
CLO_BA1567AA_AS	CD-17-00036	11	78		Human	Human	faeces	2015			Europe	Spain						no_study	98	4149644	128304	pass
CLO_BA1604AA_AS	CD-17-00073	11	126		Human	Human	faeces	2014			Europe	Spain						no_study	98	4073573	141134	pass
CLO_BA1633AA_AS	CD-17-00102	11	126		Human	Human	faeces	2016			Europe	Spain						no_study	98	4086211	134017	pass
CLO_BA1635AA_AS	CD-17-00105	11	126		Human	Human	faeces	2016			Europe	Spain						no_study	58	4007687	133916	pass
CLO_BA1645AA_AS	CD-17-00115	11	126		Human	Human	faeces	2016			Europe	Spain						no_study	113	4156296	124374	pass
CLO_BA1649AA_AS	CD-17-00119	11	126		Human	Human	faeces	2016			Europe	Spain						no_study	104	4073752	141266	pass
CLO_BA1651AA_AS	CD-17-00121	11	126		Human	Human	faeces	2016			Europe	Spain						no_study	72	4067460	134126	pass
CLO_BA1664AA_AS	CD-17-00134	11	126		Human	Human	faeces	2016			Europe	Spain						no_study	110	4158829	134017	pass
CLO_BA1665AA_AS	CD-17-00135	11	126		Human	Human	faeces	2016			Europe	Spain						no_study	110	4152116	125907	pass
CLO_BA1680AA_AS	CD-17-00151	11	78		Human	Human	faeces	2014			Europe	Spain						no_study	102	3968201	128190	pass
CLO_BA1685AA_AS	CD-17-00157	11	126		Human	Human	faeces	2014			Europe	Spain						no_study	94	4038448	141759	pass
CLO_BA1687AA_AS	CD-17-00159	11	126		Human	Human	faeces	2014			Europe	Spain						no_study	139	4054802	128598	pass
CLO_BA1699AA_AS	CD-17-00171	11	126		Human	Human	faeces	2014			Europe	Spain						no_study	92	4064367	134859	pass
CLO_BA1706AA_AS	CD-17-00179	11	78		Human	Human	faeces	2014			Europe	Spain						no_study	103	4111229	134907	pass
CLO_BA2907AA_AS	CD-17-00201	11	126		Human	Human	faeces	2016			Europe	Spain						no_study	108	3985565	127743	pass
CLO_BA2909AA_AS	CD-17-00205	11	126		Human	Human	faeces	2014			Europe	Spain						no_study	53	3965221	141322	pass
CLO_BA2910AA_AS	CD-17-00206	11	126		Human	Human	faeces	2015			Europe	Spain						no_study	119	4093047	135013	pass
SAMN06579266	ST11	11	78		Human	Human	Homo sapiens; Faecal	2014	4	24	Europe	United Kingdom	Scotland	Glasgow City	Glasgow	PRJNA379066	SRR5365898	no_study	79	3904622	210918	pass
SAMN06579267	ST11	11	78	npmA2	Human	Human	Homo sapiens; Faecal	2014	4	24	Europe	United Kingdom	Scotland	Glasgow City	Glasgow	PRJNA379066	SRR5365897	no_study	85	4002162	183395	pass
SAMN06579269	ST11	11	78	npmA2	Human	Human	Homo sapiens; Faecal	2014	4	24	Europe	United Kingdom	Scotland	Glasgow City	Glasgow	PRJNA379066	SRR5365895	no_study	78	3998810	195392	pass
SAMN06579270	ST11	11	78		Human	Human	Homo sapiens; Faecal	2014	4	24	Europe	United Kingdom	Scotland	Glasgow City	Glasgow	PRJNA379066	SRR5365894	no_study	83	3913217	164053	pass
SAMN06579272	ST11	11	78		Human	Human	Homo sapiens; Faecal	2014	4	24	Europe	United Kingdom	Scotland	Glasgow City	Glasgow	PRJNA379066	SRR5365892	no_study	77	3877973	188935	pass
SAMN06579273	ST11	11	78		Human	Human	Homo sapiens; Faecal	2014	4	24	Europe	United Kingdom	Scotland	Glasgow City	Glasgow	PRJNA379066	SRR5365891	no_study	73	3927669	230213	pass
SAMN06579274	ST11	11	78	npmA2	Human	Human	Homo sapiens; Faecal	2014	4	24	Europe	United Kingdom	Scotland	Glasgow City	Glasgow	PRJNA379066	SRR5365890	no_study	79	4002397	195235	pass
SAMN06675458	ST11	11	78		Human	Human	Homo sapiens; Faecal	2014	4	24	Europe	United Kingdom	Scotland			PRJNA381384	SRR5410573	Dingle2019	72	3918976	230973	pass
SAMN06675459	ST11	11	78		Human	Human	Homo sapiens; Faecal	2014	4	24	Europe	United Kingdom	Scotland			PRJNA381384	SRR5410572	Dingle2019	86	3880769	164249	pass
SAMN06675460	ST11	11	78		Human	Human	Homo sapiens; Faecal	2014	4	24	Europe	United Kingdom	Scotland			PRJNA381384	SRR5410571	Dingle2019	72	3878826	210909	pass
SAMN06675463	ST11	11	78		Human	Human	Homo sapiens; Faecal	2014	4	24	Europe	United Kingdom	Scotland			PRJNA381384	SRR5410568	Dingle2019	84	3880693	189035	pass
SAMN06675465	ST11	11	78	npmA2	Human	Human	Homo sapiens; Faecal	2014	4	24	Europe	United Kingdom	Scotland			PRJNA381384	SRR5410566	Dingle2019	75	4001248	190606	pass
SAMN06675467	ST11	11	78		Human	Human	Homo sapiens; Faecal	2014	4	24	Europe	United Kingdom	Scotland			PRJNA381384	SRR5410564	Dingle2019	79	3904622	210918	pass
SAMN06675468	ST11	11	78	npmA2	Human	Human	Homo sapiens; Faecal	2014	4	24	Europe	United Kingdom	Scotland			PRJNA381384	SRR5410563	Dingle2019	85	4002162	183395	pass
SAMN06675470	ST11	11	78	npmA2	Human	Human	Homo sapiens; Faecal	2014	4	24	Europe	United Kingdom	Scotland			PRJNA381384	SRR5410561	Dingle2019	78	3998810	195392	pass
SAMN06675471	ST11	11	78		Human	Human	Homo sapiens; Faecal	2014	4	24	Europe	United Kingdom	Scotland			PRJNA381384	SRR5410560	Dingle2019	83	3913217	164053	pass
SAMN06675473	ST11	11	78		Human	Human	Homo sapiens; Faecal	2014	4	24	Europe	United Kingdom	Scotland			PRJNA381384	SRR5410558	Dingle2019	77	3877974	188935	pass
SAMN06675474	ST11	11	78		Human	Human	Homo sapiens; Faecal	2014	4	24	Europe	United Kingdom	Scotland			PRJNA381384	SRR5410557	Dingle2019	72	3927820	230213	pass
SAMN06675476	ST11	11	78	npmA2	Human	Human	Homo sapiens; Faecal	2014	4	24	Europe	United Kingdom	Scotland			PRJNA381384	SRR5410555	Dingle2019	79	4002397	195235	pass
SAMN06675480	ST11	11	78		Human	Human	Homo sapiens; Faecal	2014	4	24	Europe	United Kingdom	Scotland			PRJNA381384	SRR5410551	Dingle2019	82	3888032	164249	pass
SAMN06675482	ST11	11	78		Human	Human	Homo sapiens; Faecal	2014	4	24	Europe	United Kingdom	Scotland			PRJNA381384	SRR5410549	Dingle2019	79	3914446	188929	pass
SAMN06675484	ST11	11	78		Human	Human	Homo sapiens; Faecal	2014	4	24	Europe	United Kingdom	Scotland			PRJNA381384	SRR5410547	Dingle2019	84	4039364	186993	pass
SAMN06675485	ST11	11	78		Human	Human	Homo sapiens; Faecal	2014	4	24	Europe	United Kingdom	Scotland			PRJNA381384	SRR5410546	Dingle2019	77	4038487	192864	pass
SAMN06675486	ST11	11	78		Human	Human	Homo sapiens; Faecal	2014	4	24	Europe	United Kingdom	Scotland			PRJNA381384	SRR5410545	Dingle2019	75	3955186	259089	pass
SAMN06675488	ST11	11	78		Human	Human	Homo sapiens; Faecal	2014	4	24	Europe	United Kingdom	Scotland			PRJNA381384	SRR5410543	Dingle2019	81	3916035	210875	pass
SAMN06675489	ST11	11	78		Human	Human	Homo sapiens; Faecal	2014	4	24	Europe	United Kingdom	Scotland			PRJNA381384	SRR5410542	Dingle2019	76	3974533	230208	pass
SAMN06675494	ST11	11	78		Human	Human	Homo sapiens; Faecal	2014	4	24	Europe	United Kingdom	Scotland			PRJNA381384	SRR5410537	Dingle2019	83	4073135	164177	pass
SAMN06675495	ST11	11	78		Human	Human	Homo sapiens; Faecal	2014	4	24	Europe	United Kingdom	Scotland			PRJNA381384	SRR5410536	Dingle2019	83	3897273	164249	pass
SAMN06675497	ST11	11	78		Human	Human	Homo sapiens; Faecal	2014	4	24	Europe	United Kingdom	Scotland			PRJNA381384	SRR5410534	Dingle2019	68	3904139	230581	pass
SAMN06675498	ST11	11	78		Human	Human	Homo sapiens; Faecal	2014	4	24	Europe	United Kingdom	Scotland			PRJNA381384	SRR5410533	Dingle2019	77	4072695	188887	pass
SAMN06675499	ST11	11	78		Human	Human	Homo sapiens; Faecal	2014	4	24	Europe	United Kingdom	Scotland			PRJNA381384	SRR5410532	Dingle2019	77	3912606	201014	pass
SAMN06675500	ST11	11	78		Human	Human	Homo sapiens; Faecal	2014	4	24	Europe	United Kingdom	Scotland			PRJNA381384	SRR5410531	Dingle2019	71	3911348	188569	pass
SAMN06675501	ST11	11	78		Human	Human	Homo sapiens; Faecal	2014	4	24	Europe	United Kingdom	Scotland			PRJNA381384	SRR5410530	Dingle2019	85	3912910	160541	pass
SAMN06675502	ST11	11	78		Human	Human	Homo sapiens; Faecal	2014	4	24	Europe	United Kingdom	Scotland			PRJNA381384	SRR5410529	Dingle2019	74	3878853	188121	pass
SAMN06675504	ST11	11	78		Human	Human	Homo sapiens; Faecal	2014	4	24	Europe	United Kingdom	Scotland			PRJNA381384	SRR5410527	Dingle2019	80	3910823	164177	pass
SAMN06675514	ST11	11	78		Human	Human	Homo sapiens; Faecal	2014	4	24	Europe	United Kingdom	Scotland			PRJNA381384	SRR5410517	Dingle2019	88	3937123	210884	pass
SAMN06675520	ST11	11	78		Human	Human	Homo sapiens; Faecal	2014	4	24	Europe	United Kingdom	Scotland			PRJNA381384	SRR5410511	Dingle2019	79	3906747	184491	pass
SAMN06675526	ST11	11	78	npmA2	Human	Human	Homo sapiens; Faecal	2014	4	24	Europe	United Kingdom	Scotland			PRJNA381384	SRR5410505	Dingle2019	82	3968392	163933	pass
SAMN06675534	ST11	11	78	npmA2	Human	Human	Homo sapiens; Faecal	2014	4	24	Europe	United Kingdom	Scotland			PRJNA381384	SRR5410497	Dingle2019	82	3996955	188950	pass
SAMN06675539	ST11	11	78	npmA2	Human	Human	Homo sapiens; Faecal	2014	4	24	Europe	United Kingdom	Scotland			PRJNA381384	SRR5410492	Dingle2019	71	3986105	164249	pass
SAMN06675543	ST11	11	78		Human	Human	Homo sapiens; Faecal	2014	4	24	Europe	United Kingdom	Scotland			PRJNA381384	SRR5410488	Dingle2019	78	3912841	200563	pass
SAMN06675547	ST11	11	78		Human	Human	Homo sapiens; Faecal	2014	4	24	Europe	United Kingdom	Scotland			PRJNA381384	SRR5410484	Dingle2019	83	4009256	163925	pass
SAMN06675548	ST11	11	78		Human	Human	Homo sapiens; Faecal	2014	4	24	Europe	United Kingdom	Scotland			PRJNA381384	SRR5410483	Dingle2019	81	3984824	188907	pass
SAMN06675551	ST11	11	78	npmA2	Human	Human	Homo sapiens; Faecal	2014	4	24	Europe	United Kingdom	Scotland			PRJNA381384	SRR5410480	Dingle2019	82	3949199	188907	pass
SAMN06675557	ST11	11	78		Human	Human	Homo sapiens; Faecal	2014	4	24	Europe	United Kingdom	Scotland			PRJNA381384	SRR5410474	Dingle2019	65	3912286	188949	pass
SAMN06675558	ST11	11	78		Human	Human	Homo sapiens; Faecal	2014	4	24	Europe	United Kingdom	Scotland			PRJNA381384	SRR5410473	Dingle2019	79	4039349	164228	pass
CLO_BA2950AA_AS	CD-17-00154	11	78		Human	Human	faeces	2014			Europe	Spain						no_study	97	4051964	152906	pass
CLO_BA3688AA_AS	17.8102	11	78		Human	Human		2017			Europe	United Kingdom	Scotland					no_study	270	3980203	107281	fail
CLO_CA7985AA_AS	CD-15-00829	11			Human	Human		2014			Europe	Germany						no_study	136	3890311	75176	pass
CLO_DA1491AA_AS	CD-18-00491	11									Europe	Germany						no_study	221	4044242	42181	fail
CLO_DA1493AA_AS	CD-18-00512	11		npmA2							Europe	Germany						no_study	100	4019800	96017	pass
SAMN03487137	DSM 29020	11			Human	Human	Homo sapiens	2014			Asia	Indonesia				PRJNA224116		Haft2018	1	4139418	4139418	pass
SAMN10765998	0000-0076-6893	11			Human	Human	Homo sapiens; stool	2017			North America	United States	Massachusetts	Suffolk County	Boston	PRJNA278886	SRR8452237	Nudel2018	124	4018460	94727	pass
SAMN10765993	0000-0076-3872	11			Human	Human	Homo sapiens; stool	2017			North America	United States	Massachusetts	Suffolk County	Boston	PRJNA278886	SRR8452238	Nudel2018	135	4014689	77981	pass
SAMEA4475708	e396b5a0-8558-11e6-ad90-3c4a9275d6c8	11														PRJEB2958	ERR2744687	no_study	65	4043735	163472	pass
SAMN09406403	MMMOSAM:cc8c1189-f7be-4664-b6c8-dbe6818e0579	11	78		Human	Human	Homo sapiens; clinical sample	2013	7	9	Europe	Portugal				PRJNA398458	SRR7309171	Eyre2018	118	3907330	82138	pass
SAMN09406417	MMMOSAM:c6755f7e-697c-422a-ab7f-b23689f3d00b	11	78		Human	Human	Homo sapiens; clinical sample	2013	1	6	Europe	Ireland				PRJNA398458	SRR7308912	Eyre2018	251	3913507	32418	fail
SAMN09060494	0000-0075-3456	11			Human	Human	Homo sapiens; stool	2017			North America	United States	Massachusetts	Suffolk County	Boston	PRJNA278886	SRR7108985	Nudel2018	140	4206297	91470	pass
SAMN07609926	MMMOSAM:3962d71b-71bd-4bff-8919-85076fbc8637	11			Human	Human	Homo sapiens; clinical sample	2014	3	17	Europe	United Kingdom				PRJNA369188	SRR6009234	Eyre2017	117	4059280	162796	pass
SAMN07609539	MMMOSAM:9d3b8c59-91e8-410e-b25d-641dd7568720	11			Human	Human	Homo sapiens; clinical sample	2014	1	23	Europe	United Kingdom				PRJNA369188	SRR6008992	Eyre2017	174	4015992	55231	pass
SAMN07609404	MMMOSAM:c13a80f0-ae1d-40cd-95b8-7959e18314f5	11		npmA2	Human	Human	Homo sapiens; clinical sample	2014	2	12	Europe	United Kingdom				PRJNA369188	SRR6009155	Eyre2017	109	3983739	145227	pass
SAMN05219394	MMMOSAM:aa6dc448-2df2-4168-b8b4-1437032042ca	11			Human	Human	Homo sapiens; clinical sample	2010	8	24	Europe	United Kingdom	England	Oxfordshire		PRJNA318370	SRR3654517	Stoesser2017	101	4016615	144960	pass
SAMN05209613	MMMOSAM:d6c4a1db-7e68-4456-b1f3-187d22add3b8	11			Human	Human	Homo sapiens; Study sample	2012	11	11	Europe	United Kingdom	England	Oxfordshire		PRJNA318370	SRR3631862	Stoesser2017	127	3967183	147440	pass
SAMN05209508	MMMOSAM:adcc71f2-5003-4d11-83bb-76a434e52d10	11			Human	Human	Homo sapiens; Study sample	2012	12	8	Europe	United Kingdom	England	Oxfordshire		PRJNA318370	SRR3631740	Stoesser2017	125	3967479	162797	pass
SAMN05209484	MMMOSAM:a0d96e6a-349d-422e-9d3f-142704795d20	11			Human	Human	Homo sapiens; clinical sample	2012	6	20	Europe	United Kingdom	England	Oxfordshire		PRJNA318370	SRR3631582	Stoesser2017	165	3886532	49764	pass
SAMN05209431	MMMOSAM:8ab728b7-e1bf-41cc-a495-6112d2ae41f7	11			Human	Human	Homo sapiens; clinical sample				Oceania	Australia				PRJNA318370	SRR3631508	Stoesser2017	126	4042109	147343	pass
SAMN05209373	MMMOSAM:738956fc-f1b9-481b-a30a-e04ec5ac43bf	11			Human	Human	Homo sapiens; clinical sample	2013	1	17	Europe	United Kingdom	England	Oxfordshire		PRJNA318370	SRR3631400	Stoesser2017	105	3893209	163571	pass
SAMN05209210	MMMOSAM:2e2ce228-db51-4630-b941-a25facd911d7	11			Human	Human	Homo sapiens; clinical sample	2012	10	16	Europe	United Kingdom	England	Oxfordshire		PRJNA318370	SRR3631234	Stoesser2017	121	3940491	152818	pass
SAMN05209189	MMMOSAM:230889c0-6e61-48ed-a951-892348fbfde4	11			Human	Human	Homo sapiens; clinical sample	2013	1	17	Europe	United Kingdom	England	Oxfordshire		PRJNA318370	SRR3631212	Stoesser2017	115	3898952	162842	pass
SAMN05209173	MMMOSAM:1c9aca5e-1d29-4723-a163-a140da051324	11			Human	Human	Homo sapiens; clinical sample	2010	8	28	Europe	United Kingdom	England	Oxfordshire		PRJNA318370	SRR3631194	Stoesser2017	70	3897526	141716	pass
SAMN05209150	MMMOSAM:1380ed28-fb72-46cd-b9ae-cf253e4bffc7	11			Human	Human	Homo sapiens; clinical sample				Europe	United Kingdom	England		Leeds	PRJNA318370	SRR3631171	Stoesser2017	89	4141678	180558	pass
SAMN05208772	MMMOSAM:f5e0464b-5f97-4f5f-ac56-971a87ebb402	11			Human	Human	Homo sapiens; clinical sample				Oceania	Australia				PRJNA318370	SRR3630930	Stoesser2017	81	4053985	127704	pass
SAMN05208612	MMMOSAM:b52cde5f-fe8e-4916-b82f-fdbfd0a98dda	11			Human	Human	Homo sapiens; clinical sample				Europe	United Kingdom	England		Leeds	PRJNA318370	SRR3630562	Stoesser2017	141	4030841	67344	pass
SAMN05208392	MMMOSAM:5a08baf7-de27-4b66-a67d-317372f2c2c3	11			Human	Human	Homo sapiens; clinical sample				Oceania	Australia				PRJNA318370	SRR3630220	Stoesser2017	107	4101568	124343	pass
SAMN05208323	MMMOSAM:33ed68d7-ec89-4d53-800e-e2a2fb37a283	11			Human	Human	Homo sapiens; clinical sample				Oceania	Australia				PRJNA318370	SRR3630150	Stoesser2017	105	4108492	119908	pass
SAMN05208111	MMMOSAM:db53ff53-8841-4b9f-ae5a-291c2c90ec49	11			Human	Human	Homo sapiens; clinical sample				Europe	United Kingdom	England		Leeds	PRJNA318370	SRR3629733	Stoesser2017	113	3901964	141020	pass
SAMN05207915	MMMOSAM:5b4adcb9-d58a-48c4-b840-788397eda518	11			Human	Human	Homo sapiens; clinical sample				Europe	United Kingdom	England		Leeds	PRJNA318370	SRR3629506	Stoesser2017	108	3875539	163041	pass
SAMN05207793	MMMOSAM:412c9233-8c5e-4e71-943b-91ca9843ba49	11			Human	Human	Homo sapiens; clinical sample				Europe	United Kingdom	England		Leeds	PRJNA318370	SRR3629445	Stoesser2017	124	3968920	141796	pass
SAMN04870637	MMMOSAM:45e504bd-3c22-4c60-b9c5-10a21041aacd	11			Human	Human	Homo sapiens; clinical sample	2011	12	3	Europe	United Kingdom	England		Leeds	PRJNA317528	SRR3358246	Martin2018	82	3877369	125576	pass
SAMN04870631	MMMOSAM:40abe06c-956e-4b49-8d40-7f5b3e3f527b	11			Human	Human	Homo sapiens; clinical sample	2011	6	5	Europe	United Kingdom	England		Leeds	PRJNA317528	SRR3358227	Martin2018	75	3892570	140805	pass
SAMN04870570	MMMOSAM:141a2b56-ddbf-4fc4-b7bf-18297d3a7652	11			Human	Human	Homo sapiens; clinical sample	2012	4	11	Europe	United Kingdom	England		Leeds	PRJNA317528	SRR3357647	Martin2018	151	4027284	81395	pass
SAMN04870775	MMMOSAM:af95b8ea-8bbf-407b-8159-069c2c1b97dc	11			Human	Human	Homo sapiens; clinical sample	2011	8	9	Europe	United Kingdom	England		Leeds	PRJNA317528	SRR3356102	Martin2018	93	4118168	118606	pass
SAMN04870746	MMMOSAM:95b69c18-20b8-4b75-8875-50af04fd6096	11			Human	Human	Homo sapiens; clinical sample	2010	10	2	Europe	United Kingdom	England		Leeds	PRJNA317528	SRR3355919	Martin2018	71	3967834	140740	pass
SAMN04870733	MMMOSAM:8e0d0225-4d54-44a3-826e-da7f60f58c49	11			Human	Human	Homo sapiens; clinical sample	2012	2	6	Europe	United Kingdom	England		Leeds	PRJNA317528	SRR3355885	Martin2018	102	3941376	108674	pass
SAMN04870650	MMMOSAM:52b7ef30-cf90-4b47-b7a1-a03767cab032	11			Human	Human	Homo sapiens; clinical sample	2012	1	12	Europe	United Kingdom	England		Leeds	PRJNA317528	SRR3355356	Martin2018	82	4066365	141110	pass
SAMN04839360	MMMOSAM:33c47ec6-9f54-49f2-8649-4309b530eb4d	11			Human	Human	Homo sapiens; clinical sample	2011	12	23	Europe	United Kingdom	England		Leeds	PRJNA317528	SRR3357961	Martin2018	82	4066616	140673	pass
SAMN04823467	MMMOSAM:08af25da-f93c-4210-a45d-72c2d5ff86f6	11			Human	Human	Homo sapiens; clinical sample	2010	11	26	Europe	United Kingdom	England		Leeds	PRJNA317528	SRR3357550	Martin2018	78	3942734	140740	pass
SAMN04821754	MMMOSAM:025d0444-8fa2-42ca-9b83-3abebf690e70	11			Human	Human	Homo sapiens; clinical sample	2012	4	18	Europe	United Kingdom	England		Leeds	PRJNA317528	SRR3357515	Martin2018	100	3941550	103061	pass
SAMN04848527	MMMOSAM:d7a7e991-509c-4186-aba7-ba4110ac62ec	11			Human	Human	Homo sapiens; clinical sample	2011	8	19	Europe	United Kingdom	England		Leeds	PRJNA317528	SRR3356227	Martin2018	126	4031266	94063	pass
SAMN04848520	MMMOSAM:d0ead500-0f27-4e50-87ea-872e3d75299e	11			Human	Human	Homo sapiens; clinical sample	2010	8	26	Europe	United Kingdom	England		Leeds	PRJNA317528	SRR3356214	Martin2018	78	3870495	134040	pass
SAMN04848348	MMMOSAM:791bc41e-650b-498d-b229-6698fdaf8d8f	11			Human	Human	Homo sapiens; clinical sample	2012	1	15	Europe	United Kingdom	England		Leeds	PRJNA317528	SRR3355749	Martin2018	84	4029595	134040	pass
SAMN04459317	Symptomatic Infection 2575	11			Human	Human	Homo sapiens; Faeces; feces	2011	3	5	Europe	United Kingdom	England		Leeds	PRJNA304087	SRR3339360	Dingle2019	93	4048542	125671	pass
SAMN04459360	Symptomatic Infection 2618	11			Human	Human	Homo sapiens; Faeces; feces	2012	4	1	Europe	United Kingdom	England		Leeds	PRJNA304087	SRR3338253	Dingle2019	95	3937232	100061	pass
SAMN04459312	Symptomatic Infection 2570	11			Human	Human	Homo sapiens; Faeces; feces	2011	1	31	Europe	United Kingdom	England		Leeds	PRJNA304087	SRR3338160	Dingle2019	88	3905386	141054	pass
SAMN04459296	Symptomatic Infection 2554	11			Human	Human	Homo sapiens; Faeces; feces	2010	8	11	Europe	United Kingdom	England		Leeds	PRJNA304087	SRR3338148	Dingle2019	84	3868344	134040	pass
SAMN04460603	Symptomatic Infection 3937	11			Human	Human	Homo sapiens; Faeces; feces	2008	11	25	North America	United States				PRJNA304087	SRR3340268	Dingle2019	109	3923148	152818	pass
SAMN04460598	Symptomatic Infection 3932	11			Human	Human	Homo sapiens; Faeces; feces	2008	4	23	North America	United States				PRJNA304087	SRR3340208	Dingle2019	118	4060484	152818	pass
SAMN04460580	Symptomatic Infection 3913	11			Human	Human	Homo sapiens; Faeces; feces	2007	10	9	Europe	Belgium				PRJNA304087	SRR3340054	Dingle2019	121	4061460	162891	pass
SAMN04458499	Symptomatic Infection 1243	11			Human	Human	Homo sapiens; Faeces; feces	2007	5	12	Europe	United Kingdom	England	Oxfordshire		PRJNA304087	SRR3340010	Dingle2019	91	4029118	134081	pass
SAMN04459357	Symptomatic Infection 2615	11			Human	Human	Homo sapiens; Faeces; feces	2012	2	6	Europe	United Kingdom	England		Leeds	PRJNA304087	SRR3339374	Dingle2019	102	3941508	108674	pass
SAMN04459388	Symptomatic Infection 2646	11			Human	Human	Homo sapiens; Faeces; feces	2012	12	1	Europe	United Kingdom	England		Leeds	PRJNA304087	SRR3339365	Dingle2019	122	3873823	141425	pass
SAMN04459931	Symptomatic Infection 3198	11			Human	Human	Homo sapiens; Faeces; feces	2011	1	5	Europe	United Kingdom	England	Oxfordshire		PRJNA304087	SRR3339325	Dingle2019	77	4050097	140805	pass
SAMN04459356	Symptomatic Infection 2614	11			Human	Human	Homo sapiens; Faeces; feces	2012	1	15	Europe	United Kingdom	England		Leeds	PRJNA304087	SRR3338966	Dingle2019	84	4029481	134040	pass
SAMN04458530	Symptomatic Infection 1314	11			Human	Human	Homo sapiens; Faeces; feces	2012	11	4	Europe	United Kingdom	England	Oxfordshire		PRJNA304087	SRR3338919	Dingle2019	146	4038868	99866	pass
SAMN04459398	Symptomatic Infection 2656	11			Human	Human	Homo sapiens; Faeces; feces	2013	4	4	Europe	United Kingdom	England		Leeds	PRJNA304087	SRR3338800	Dingle2019	129	3982570	128557	pass
SAMN04459367	Symptomatic Infection 2625	11			Human	Human	Homo sapiens; Faeces; feces	2012	6	20	Europe	United Kingdom	England		Leeds	PRJNA304087	SRR3338665	Dingle2019	178	4203979	125599	pass
SAMN04459383	Symptomatic Infection 2641	11			Human	Human	Homo sapiens; Faeces; feces	2012	10	7	Europe	United Kingdom	England		Leeds	PRJNA304087	SRR3338566	Dingle2019	123	3908169	143053	pass
SAMN04458532	Symptomatic Infection 1316	11			Human	Human	Homo sapiens; Faeces; feces	2012	11	23	Europe	United Kingdom	England	Oxfordshire		PRJNA304087	SRR3338529	Dingle2019	122	3898717	152818	pass
SAMN04459350	Symptomatic Infection 2608	11			Human	Human	Homo sapiens; Faeces; feces	2011	12	3	Europe	United Kingdom	England		Leeds	PRJNA304087	SRR3338487	Dingle2019	82	3877665	125576	pass
SAMN04459332	Symptomatic Infection 2590	11			Human	Human	Homo sapiens; Faeces; feces	2011	6	5	Europe	United Kingdom	England		Leeds	PRJNA304087	SRR3338464	Dingle2019	75	3892472	140805	pass
SAMN04459354	Symptomatic Infection 2612	11			Human	Human	Homo sapiens; Faeces; feces	2011	12	23	Europe	United Kingdom	England		Leeds	PRJNA304087	SRR3338211	Dingle2019	82	4066887	140673	pass
SAMN04459938	Symptomatic Infection 3205	11			Human	Human	Homo sapiens; Faeces; feces	2012	11	22	Europe	United Kingdom	England	Oxfordshire		PRJNA304087	SRR3338198	Dingle2019	121	3897791	152818	pass
SAMN04459937	Symptomatic Infection 3204	11			Human	Human	Homo sapiens; Faeces; feces	2012	10	15	Europe	United Kingdom	England	Oxfordshire		PRJNA304087	SRR3338135	Dingle2019	120	3939489	141220	pass
SAMN04459397	Symptomatic Infection 2655	11			Human	Human	Homo sapiens; Faeces; feces	2013	4	1	Europe	United Kingdom	England		Leeds	PRJNA304087	SRR3337781	Dingle2019	129	3908529	152818	pass
SAMN04459307	Symptomatic Infection 2565	11			Human	Human	Homo sapiens; Faeces; feces	2010	11	26	Europe	United Kingdom	England		Leeds	PRJNA304087	SRR3337613	Dingle2019	78	3942682	140740	pass
SAMN04459328	Symptomatic Infection 2586	11			Human	Human	Homo sapiens; Faeces; feces	2011	5	11	Europe	United Kingdom	England		Leeds	PRJNA304087	SRR3337601	Dingle2019	75	4011544	140805	pass
SAMN04459368	Symptomatic Infection 2626	11			Human	Human	Homo sapiens; Faeces; feces	2012	6	22	Europe	United Kingdom	England		Leeds	PRJNA304087	SRR3337588	Dingle2019	156	3887789	149989	pass
SAMN04459343	Symptomatic Infection 2601	11		npmA2	Human	Human	Homo sapiens; Faeces; feces	2011	10	5	Europe	United Kingdom	England		Leeds	PRJNA304087	SRR3335887	Dingle2019	86	4022943	140805	pass
SAMN04459384	Symptomatic Infection 2642	11			Human	Human	Homo sapiens; Faeces; feces	2012	10	22	Europe	United Kingdom	England		Leeds	PRJNA304087	SRR3335861	Dingle2019	112	3994880	128671	pass
SAMN04459372	Symptomatic Infection 2630	11			Human	Human	Homo sapiens; Faeces; feces	2012	7	9	Europe	United Kingdom	England		Leeds	PRJNA304087	SRR3335577	Dingle2019	106	3976499	147708	pass
SAMN04459387	Symptomatic Infection 2645	11			Human	Human	Homo sapiens; Faeces; feces	2012	11	14	Europe	United Kingdom	England		Leeds	PRJNA304087	SRR3335217	Dingle2019	150	3993643	90320	pass
SAMN04459379	Symptomatic Infection 2637	11			Human	Human	Homo sapiens; Faeces; feces	2012	9	11	Europe	United Kingdom	England		Leeds	PRJNA304087	SRR3335214	Dingle2019	159	3951346	110834	pass
SAMN04459339	Symptomatic Infection 2597	11			Human	Human	Homo sapiens; Faeces; feces	2011	8	9	Europe	United Kingdom	England		Leeds	PRJNA304087	SRR3335199	Dingle2019	93	4118168	118606	pass
SAMN04458531	Symptomatic Infection 1315	11			Human	Human	Homo sapiens; Faeces; feces	2012	11	19	Europe	United Kingdom	England	Oxfordshire		PRJNA304087	SRR3335196	Dingle2019	100	3889236	162797	pass
SAMN04459380	Symptomatic Infection 2638	11			Human	Human	Homo sapiens; Faeces; feces	2012	9	27	Europe	United Kingdom	England		Leeds	PRJNA304087	SRR3335178	Dingle2019	127	4079324	134026	pass
SAMN04459300	Symptomatic Infection 2558	11			Human	Human	Homo sapiens; Faeces; feces	2010	10	2	Europe	United Kingdom	England		Leeds	PRJNA304087	SRR3334844	Dingle2019	71	3967934	140740	pass
SAMN04460582	Symptomatic Infection 3915	11			Human	Human	Homo sapiens; Faeces; feces	2009	6	24	Europe	Belgium				PRJNA304087	SRR3334450	Dingle2019	115	4033769	163571	pass
SAMN04458496	Symptomatic Infection 1239	11			Human	Human	Homo sapiens; Faeces; feces	2006	9	20	Europe	United Kingdom	England	Oxfordshire		PRJNA304087	SRR3334159	Dingle2019	141	3971316	64332	pass
SAMN04460592	Symptomatic Infection 3925	11			Human	Human	Homo sapiens; Faeces; feces	2008	6	23	Europe	Italy				PRJNA304087	SRR3334098	Dingle2019	112	4069189	147343	pass
SAMN04460609	Symptomatic Infection 3943	11		npmA2	Human	Human	Homo sapiens; Faeces; feces	2008	1	7	North America	United States				PRJNA304087	SRR3334084	Dingle2019	121	3985219	163571	pass
SAMN04458501	Symptomatic Infection 1245	11			Human	Human	Homo sapiens; Faeces; feces	2007	5	30	Europe	United Kingdom	England	Oxfordshire		PRJNA304087	SRR3333796	Dingle2019	101	3976611	94063	pass
SAMN04460606	Symptomatic Infection 3940	11			Human	Human	Homo sapiens; Faeces; feces	2007	8	30	North America	United States				PRJNA304087	SRR3333731	Dingle2019	122	3870832	163571	pass
SAMN04458497	Symptomatic Infection 1240	11			Human	Human	Homo sapiens; Faeces; feces	2006	9	20	Europe	United Kingdom	England	Oxfordshire		PRJNA304087	SRR3333625	Dingle2019	124	3903971	162797	pass
SAMN04458513	Symptomatic Infection 1297	11		npmA2	Human	Human	Homo sapiens; Faeces; feces	2011	6	9	Europe	United Kingdom	England	Oxfordshire		PRJNA304087	SRR3333350	Dingle2019	88	3978384	134205	pass
SAMN04460593	Symptomatic Infection 3926	11			Human	Human	Homo sapiens; Faeces; feces	2009	2	26	Europe	Italy				PRJNA304087	SRR3333317	Dingle2019	124	4116609	152818	pass
SAMN04460935	Asymptomatic infection 74	11			Human	Human	Homo sapiens; Faeces; feces	2012	4	11	Europe	United Kingdom	England	Oxfordshire		PRJNA304087	SRR3333246	Dingle2019	121	4033570	163571	pass
SAMN04460590	Symptomatic Infection 3923	11			Human	Human	Homo sapiens; Faeces; feces	2009	6	30	Europe	Germany				PRJNA304087	SRR3333225	Dingle2019	125	4039150	147505	pass
SAMN04460594	Symptomatic Infection 3927	11			Human	Human	Homo sapiens; Faeces; feces	2009	3	11	Europe	Italy				PRJNA304087	SRR3333111	Dingle2019	94	4069645	162796	pass
SAMN04458500	Symptomatic Infection 1244	11			Human	Human	Homo sapiens; Faeces; feces	2007	5	13	Europe	United Kingdom	England	Oxfordshire		PRJNA304087	SRR3333090	Dingle2019	80	4029497	140805	pass
SAMN04460589	Symptomatic Infection 3922	11			Human	Human	Homo sapiens; Faeces; feces	2008	6	26	Europe	France				PRJNA304087	SRR3333074	Dingle2019	109	4071303	152818	pass
SAMN04460610	Symptomatic Infection 3944	11			Human	Human	Homo sapiens; Faeces; feces	2007	9	21	North America	United States				PRJNA304087	SRR3333063	Dingle2019	103	3946134	152818	pass
SAMN04458517	Symptomatic Infection 1301	11			Human	Human	Homo sapiens; Faeces; feces	2012	1	24	Europe	United Kingdom	England	Oxfordshire		PRJNA304087	SRR3333047	Dingle2019	80	4040733	134888	pass
SAMN04460934	Asymptomatic infection 73	11			Human	Human	Homo sapiens; Faeces; feces	2012	10	13	Europe	United Kingdom	England	Oxfordshire		PRJNA304087	SRR3333039	Dingle2019	128	3968644	162797	pass
SAMEA5086669	C141	11			Human	Human	Homo sapiens; Healthcare system	2015	1	1	Oceania	Australia				PRJEB22563	ERR2898872	Knight2019	67	4091375	188249	pass
SAMEA5086666	C138	11			Human	Human	Homo sapiens; Healthcare system	2007	7	1	Oceania	Australia				PRJEB22563	ERR2898869	Knight2019	105	4108591	119908	pass
SAMEA5086658	C120	11			Human	Human	Homo sapiens; Healthcare system	2006	1	1	Oceania	Australia				PRJEB22563	ERR2898861	Knight2019	107	4104462	200746	pass
SAMEA5086592	C054	11			Human	Human	Homo sapiens; Healthcare system				North America	United States	Illinois			PRJEB22563	ERR2898795	Knight2019	97	4027826	124134	pass
SAMEA5086591	C053	11			Human	Human	Homo sapiens; Healthcare system				North America	United States	Illinois			PRJEB22563	ERR2898794	Knight2019	80	4035157	133908	pass
SAMEA5086589	C051	11			Human	Human	Homo sapiens; Healthcare system				North America	United States	Illinois			PRJEB22563	ERR2898792	Knight2019	86	4024869	108674	pass
SAMEA5086585	C047	11			Human	Human	Homo sapiens; Healthcare system	2012	2	1	Asia	Taiwan				PRJEB22563	ERR2898788	Knight2019	104	3954895	101461	pass
SAMEA5086584	C046	11			Human	Human	Homo sapiens; Healthcare system	2011	6	1	Asia	Taiwan				PRJEB22563	ERR2898787	Knight2019	77	3964164	134081	pass
SAMEA5086583	C045	11			Human	Human	Homo sapiens; Healthcare system				Europe	Spain			Madrid	PRJEB22563	ERR2898786	Knight2019	84	4014778	125576	pass
SAMEA5086582	C043	11			Human	Human	Homo sapiens; Healthcare system	2008	6	1	Europe	Italy				PRJEB22563	ERR2898785	Knight2019	94	4162630	127922	pass
SAMEA5086574	C035	11			Human	Human	Homo sapiens; Healthcare system	2013	7	1	Europe	Italy				PRJEB22563	ERR2898777	Knight2019	84	4071964	134081	pass
SAMEA5086568	C029	11			Human	Human	Homo sapiens; Healthcare system	2002	6	1	Europe	Italy				PRJEB22563	ERR2898771	Knight2019	91	4098043	119772	pass
SAMEA5086565	C025	11			Human	Human	Homo sapiens; Healthcare system	2008	8	1	Oceania	Australia				PRJEB22563	ERR2898768	Knight2019	82	4051848	140806	pass
SAMEA5086563	C023	11			Human	Human	Homo sapiens; Healthcare system	2006	7	1	Oceania	Australia				PRJEB22563	ERR2898766	Knight2019	80	4046683	140805	pass
SAMEA5086561	C021	11			Human	Human	Homo sapiens; Healthcare system	2006	6	1	Oceania	Australia				PRJEB22563	ERR2898764	Knight2019	81	4021726	140805	pass
SAMEA5086560	C020	11			Human	Human	Homo sapiens; Healthcare system	2006	7	1	Oceania	Australia				PRJEB22563	ERR2898763	Knight2019	81	4053473	127704	pass
SAMEA5086556	C016	11			Human	Human	Homo sapiens; Healthcare system	2012	1	1	Oceania	Australia				PRJEB22563	ERR2898759	Knight2019	126	4041931	147343	pass
SAMEA5086554	C014	11			Human	Human	Homo sapiens; Healthcare system	2012	12	1	Oceania	Australia				PRJEB22563	ERR2898757	Knight2019	96	4044706	125671	pass
SAMEA5086551	C011	11			Human	Human	Homo sapiens; Healthcare system	2012	7	1	Oceania	Australia				PRJEB22563	ERR2898754	Knight2019	79	4020787	134081	pass
SAMEA5086545	C005	11			Human	Human	Homo sapiens; Healthcare system	2012	12	1	Oceania	Australia				PRJEB22563	ERR2898748	Knight2019	110	4048739	101498	pass
SAMEA5086544	C004	11			Human	Human	Homo sapiens; Healthcare system	2012	6	1	Oceania	Australia				PRJEB22563	ERR2898747	Knight2019	65	4012136	134079	pass
SAMEA4744616	980d1640-155a-11e8-899b-3c4a9275d6c8	11	78		Human	Human		2015			Europe	Netherlands			Nijmegen	PRJEB25045	ERR3284363	Crobach2023	137	4148639	163571	pass
SAMEA4744623	986035be-155a-11e8-899b-3c4a9275d6c8	11	78		Human	Human		2015			Europe	Netherlands			Nijmegen	PRJEB25045	ERR3284333	Crobach2023	140	4150334	141020	pass
SAMEA5556119	Cdiff_Madrid_WGS_Project_205	11			Human	Human	Homo sapiens; Human faeces	2014	2	10	Europe	Spain				PRJEB28391	ERR3299524	Garcia-fernandez2019	103	4008737	101525	pass
SAMEA5556115	Cdiff_Madrid_WGS_Project_201	11			Human	Human	Homo sapiens; Human faeces	2016	2	1	Europe	Spain				PRJEB28391	ERR3299520	Garcia-fernandez2019	115	4030325	133982	pass
SAMEA5556093	Cdiff_Madrid_WGS_Project_179	11			Human	Human	Homo sapiens; Human faeces	2014	5	7	Europe	Spain				PRJEB28391	ERR3296453	Garcia-fernandez2019	128	4104060	134022	pass
SAMEA5556085	Cdiff_Madrid_WGS_Project_171	11			Human	Human	Homo sapiens; Human faeces	2014	11	7	Europe	Spain				PRJEB28391	ERR3296446	Garcia-fernandez2019	115	4063800	134118	pass
SAMEA5556073	Cdiff_Madrid_WGS_Project_159	11			Human	Human	Homo sapiens; Human faeces	2014	2	18	Europe	Spain				PRJEB28391	ERR3293597	Garcia-fernandez2019	123	4037115	133744	pass
SAMEA5556071	Cdiff_Madrid_WGS_Project_157	11			Human	Human	Homo sapiens; Human faeces	2014	3	24	Europe	Spain				PRJEB28391	ERR3289213	Garcia-fernandez2019	117	4029826	140873	pass
SAMEA5556065	Cdiff_Madrid_WGS_Project_151	11			Human	Human	Homo sapiens; Human faeces	2014	3	3	Europe	Spain				PRJEB28391	ERR3289208	Garcia-fernandez2019	112	3964829	129076	pass
SAMEA5556049	Cdiff_Madrid_WGS_Project_135	11			Human	Human	Homo sapiens; Human faeces	2016	5	25	Europe	Spain				PRJEB28391	ERR3288580	Garcia-fernandez2019	91	4146209	128111	pass
SAMEA5556048	Cdiff_Madrid_WGS_Project_134	11			Human	Human	Homo sapiens; Human faeces	2016	5	6	Europe	Spain				PRJEB28391	ERR3288579	Garcia-fernandez2019	93	4144026	120985	pass
SAMEA5556035	Cdiff_Madrid_WGS_Project_121	11			Human	Human	Homo sapiens; Human faeces	2016	5	23	Europe	Spain				PRJEB28391	ERR3288566	Garcia-fernandez2019	84	4070911	128271	pass
SAMEA5556033	Cdiff_Madrid_WGS_Project_119	11			Human	Human	Homo sapiens; Human faeces	2016	4	18	Europe	Spain				PRJEB28391	ERR3288474	Garcia-fernandez2019	76	4058415	140805	pass
SAMEA5556029	Cdiff_Madrid_WGS_Project_115	11			Human	Human	Homo sapiens; Human faeces	2016	4	8	Europe	Spain				PRJEB28391	ERR3288470	Garcia-fernandez2019	93	4143290	125659	pass
SAMEA5556019	Cdiff_Madrid_WGS_Project_105	11			Human	Human	Homo sapiens; Human faeces	2016	3	4	Europe	Spain				PRJEB28391	ERR3288344	Garcia-fernandez2019	79	4036800	140805	pass
SAMEA5556016	Cdiff_Madrid_WGS_Project_102	11			Human	Human	Homo sapiens; Human faeces	2016	2	12	Europe	Spain				PRJEB28391	ERR3288342	Garcia-fernandez2019	82	4074340	133987	pass
SAMEA5555942	Cdiff_Madrid_WGS_Project_28	11			Human	Human	Homo sapiens; Human faeces	2015	7	15	Europe	Spain				PRJEB28391	ERR3277374	Garcia-fernandez2019	97	4152961	133912	pass
SAMEA5555920	Cdiff_Madrid_WGS_Project_6	11			Human	Human	Homo sapiens; Human faeces	2015	2	11	Europe	Spain				PRJEB28391	ERR3274939	Garcia-fernandez2019	82	4036300	127365	pass
SAMN12607101	PSM268	11			Human	Human	Homo sapiens	2011			North America	United States	Michigan			PRJNA561087	SRR9997423	Miles-Jay2021	63	3968132	162796	pass
SAMN12606939	PSM083	11			Human	Human	Homo sapiens	2012			North America	United States	Michigan			PRJNA561087	SRR9997523	Miles-Jay	61	3868620	180415	pass
SAMN13541345	UMPH130	11			Human	Human	Homo sapiens	2011			North America	United States	Michigan			PRJNA594943	SRR10665978	Miles-Jay2021	74	4059640	140904	pass
SAMN13566241	ST11_3	11			Human	Human	Homo sapiens				North America	United States	New York			PRJNA595724	SRR10694122	Miles-Jay2021	65	4009534	148049	pass
SAMN13566214	ST11_38	11			Human	Human	Homo sapiens				North America	United States	New York			PRJNA595724	SRR10694156	Miles-Jay2021	73	4021437	147395	pass
SAMN13566233	ST11_29	11			Human	Human	Homo sapiens				North America	United States	New York			PRJNA595724	SRR10694254	Miles-Jay2021	89	3912601	106263	pass
SAMN13566218	ST11_42	11			Human	Human	Homo sapiens				North America	United States	New York			PRJNA595724	SRR10693982	Miles-Jay2021	65	4065070	163571	pass
SAMEA5849299	CD-16-00079	11	126		Human	Human	Homo sapiens; stool sample				Europe	Germany				PRJEB33866	ERR3473920	Frentrup2021	87	4174122	125853	pass
SAMEA5849302	CD-16-00076	11	126		Human	Human	Homo sapiens; stool sample				Europe	Germany				PRJEB33866	ERR3473918	Frentrup2021	82	4005863	133912	pass
SAMEA5849465	CD-16-00527	11	126		Human	Human	Homo sapiens; stool sample	2010			Europe	Germany				PRJEB33868	ERR3473803	Frentrup2021	74	4070313	152817	pass
SAMEA5849457	CD-16-00515	11	78		Human	Human	Homo sapiens; stool sample	2009			Europe	Germany				PRJEB33868	ERR3473782	Frentrup2021	73	4008721	135757	pass
SAMEA5849461	CD-16-00522	11	78		Human	Human	Homo sapiens; stool sample	2009			Europe	Germany				PRJEB33868	ERR3473762	Frentrup2021	68	3929437	152818	pass
SAMEA5846545	CD-18-00561	11	78		Livestock	Pig	Swine; rectal swab	2012			Europe	Germany				PRJEB33780	ERR3465809	Frentrup2020	72	3969761	133758	pass
SAMEA5846587	CD-18-00489	11	126		Livestock	Pig	Swine; rectal swab	2012			Europe	Germany				PRJEB33780	ERR3465806	Frentrup2020	105	4054232	119964	pass
SAMEA5846544	CD-18-00562	11	78		Livestock	Pig	Swine; rectal swab	2012			Europe	Germany				PRJEB33780	ERR3465802	Frentrup2020	83	3971198	108942	pass
SAMEA5846656	CD-18-00420	11	78		Livestock	Pig	Swine; rectal swab	2012			Europe	Germany				PRJEB33780	ERR3465801	Frentrup2020	89	4060984	127680	pass
SAMEA5846652	CD-18-00424	11	78		Livestock	Pig	Swine; rectal swab	2012			Europe	Germany				PRJEB33780	ERR3465798	Frentrup2020	88	4070758	120010	pass
SAMEA5846653	CD-18-00423	11	78		Livestock	Pig	Swine; rectal swab	2012			Europe	Germany				PRJEB33780	ERR3465797	Frentrup2020	93	4069574	110762	pass
SAMEA5846557	CD-18-00530	11	78	npmA2	Livestock	Pig	Swine; rectal swab	2012			Europe	Germany				PRJEB33780	ERR3465796	Frentrup2020	76	4021348	120006	pass
SAMEA5846654	CD-18-00422	11	78		Livestock	Pig	Swine; rectal swab	2012			Europe	Germany				PRJEB33780	ERR3465794	Frentrup2020	75	4067556	120006	pass
SAMEA5846655	CD-18-00421	11	78		Livestock	Pig	Swine; rectal swab	2012			Europe	Germany				PRJEB33780	ERR3465792	Frentrup2020	74	4068740	134062	pass
SAMEA5846616	CD-18-00460	11	78		Livestock	Pig	Swine; rectal swab	2012			Europe	Germany				PRJEB33780	ERR3465789	Frentrup2020	88	4067979	134577	pass
SAMEA5846699	CD-18-00337	11	78		Livestock	Pig	Swine; rectal swab	2012			Europe	Germany				PRJEB33780	ERR3465786	Frentrup2020	104	4121924	103483	pass
SAMEA5846611	CD-18-00465	11	78		Livestock	Pig	Swine; rectal swab	2012			Europe	Germany				PRJEB33780	ERR3465784	Frentrup2020	100	4069020	95579	pass
SAMEA5846612	CD-18-00464	11	78		Livestock	Pig	Swine; rectal swab	2012			Europe	Germany				PRJEB33780	ERR3465782	Frentrup2020	93	4067040	106698	pass
SAMEA5846613	CD-18-00463	11	78		Livestock	Pig	Swine; rectal swab	2012			Europe	Germany				PRJEB33780	ERR3465781	Frentrup2020	99	4069947	134298	pass
SAMEA5846716	CD-18-00318	11	126		Livestock	Pig	Swine; rectal swab	2012			Europe	Germany				PRJEB33780	ERR3465777	Frentrup2020	120	4040921	75260	pass
SAMEA5846615	CD-18-00461	11	78		Livestock	Pig	Swine; rectal swab	2012			Europe	Germany				PRJEB33780	ERR3465775	Frentrup2020	90	4074404	112350	pass
SAMEA5846607	CD-18-00469	11	78		Livestock	Pig	Swine; rectal swab	2012			Europe	Germany				PRJEB33780	ERR3465771	Frentrup2020	106	4065702	93259	pass
SAMEA5846651	CD-18-00425	11	78		Livestock	Pig	Swine; rectal swab	2012			Europe	Germany				PRJEB33780	ERR3465768	Frentrup2020	83	4067889	120076	pass
SAMEA5846608	CD-18-00468	11	78		Livestock	Pig	Swine; rectal swab	2012			Europe	Germany				PRJEB33780	ERR3465767	Frentrup2020	87	4068803	119968	pass
SAMEA5846556	CD-18-00532	11	78		Livestock	Pig	Swine; rectal swab	2012			Europe	Germany				PRJEB33780	ERR3465766	Frentrup2020	72	3976962	133752	pass
SAMEA5846672	CD-18-00365	11	126		Livestock	Pig	Swine; rectal swab	2012			Europe	Germany				PRJEB33780	ERR3465764	Frentrup2020	68	4039155	138642	pass
SAMEA5846693	CD-18-00344	11	78		Livestock	Pig	Swine; rectal swab	2012			Europe	Germany				PRJEB33780	ERR3465763	Frentrup2020	119	4122921	94880	pass
SAMEA5846610	CD-18-00466	11	78		Livestock	Pig	Swine; rectal swab	2012			Europe	Germany				PRJEB33780	ERR3465761	Frentrup2020	85	4068626	120002	pass
SAMEA5846586	CD-18-00490	11	126		Livestock	Pig	Swine; rectal swab	2012			Europe	Germany				PRJEB33780	ERR3465760	Frentrup2020	181	4050269	45938	pass
SAMEA5846561	CD-18-00524	11	78	npmA2	Livestock	Pig	Swine; rectal swab	2012			Europe	Germany				PRJEB33780	ERR3465757	Frentrup2020	79	4019982	125636	pass
SAMEA5846694	CD-18-00342	11	78		Livestock	Pig	Swine; rectal swab	2012			Europe	Germany				PRJEB33780	ERR3465756	Frentrup2020	119	4121322	94940	pass
SAMEA5846696	CD-18-00340	11	78		Livestock	Pig	Swine; rectal swab	2012			Europe	Germany				PRJEB33780	ERR3465751	Frentrup2020	113	4121320	93217	pass
SAMEA5846583	CD-18-00494	11	126		Livestock	Pig	Swine; rectal swab	2012			Europe	Germany				PRJEB33780	ERR3465750	Frentrup2020	99	4051457	119964	pass
SAMEA5846584	CD-18-00493	11	126		Livestock	Pig	Swine; rectal swab	2012			Europe	Germany				PRJEB33780	ERR3465747	Frentrup2020	122	4051971	90343	pass
SAMEA5846585	CD-18-00492	11	126		Livestock	Pig	Swine; rectal swab	2012			Europe	Germany				PRJEB33780	ERR3465744	Frentrup2020	157	4049660	69461	pass
SAMEA5846599	CD-18-00477	11	78		Livestock	Pig	Swine; rectal swab	2012			Europe	Germany				PRJEB33780	ERR3465743	Frentrup2020	102	4006165	119964	pass
SAMEA5846666	CD-18-00370	11	126		Livestock	Pig	Swine; rectal swab	2012			Europe	Germany				PRJEB33780	ERR3465741	Frentrup2020	77	4046184	141007	pass
SAMEA5846715	CD-18-00319	11	126		Livestock	Pig	Swine; rectal swab	2012			Europe	Germany				PRJEB33780	ERR3465738	Frentrup2020	88	4041057	111763	pass
SAMEA5846669	CD-18-00368	11	126		Livestock	Pig	Swine; rectal swab	2012			Europe	Germany				PRJEB33780	ERR3465736	Frentrup2020	65	4042875	134566	pass
SAMEA5846606	CD-18-00470	11	78		Livestock	Pig	Swine; rectal swab	2012			Europe	Germany				PRJEB33780	ERR3465730	Frentrup2020	95	4078469	112075	pass
SAMEA5846609	CD-18-00467	11	78		Livestock	Pig	Swine; rectal swab	2012			Europe	Germany				PRJEB33780	ERR3465716	Frentrup2020	79	4070936	134103	pass
SAMEA5846697	CD-18-00339	11	78		Livestock	Pig	Swine; rectal swab	2012			Europe	Germany				PRJEB33780	ERR3465710	Frentrup2020	106	4122586	110755	pass
SAMEA5846711	CD-18-00323	11	126		Livestock	Pig	Swine; rectal swab	2012			Europe	Germany				PRJEB33780	ERR3465706	Frentrup2020	87	4043560	133754	pass
SAMEA5846665	CD-18-00371	11	126		Livestock	Pig	Swine; rectal swab	2012			Europe	Germany				PRJEB33780	ERR3465703	Frentrup2020	67	4043920	134064	pass
SAMEA5846713	CD-18-00321	11	126		Livestock	Pig	Swine; rectal swab	2012			Europe	Germany				PRJEB33780	ERR3465701	Frentrup2020	77	4044255	140873	pass
SAMEA5846571	CD-18-00509	11	78		Livestock	Pig	Swine; rectal swab	2012			Europe	Germany				PRJEB33780	ERR3465679	Frentrup2020	85	4084530	133752	pass
SAMEA5846671	CD-18-00366	11	126		Livestock	Pig	Swine; rectal swab	2012			Europe	Germany				PRJEB33780	ERR3465677	Frentrup2020	74	4046108	140877	pass
SAMEA5846547	CD-18-00559	11	126		Livestock	Pig	Swine; rectal swab	2012			Europe	Germany				PRJEB33780	ERR3465666	Frentrup2020	77	4039307	134103	pass
SAMEA5846702	CD-18-00334	11	78		Livestock	Pig	Swine; rectal swab	2012			Europe	Germany				PRJEB33780	ERR3465665	Frentrup2020	124	4123948	95713	pass
SAMEA5846667	CD-18-00369	11	126		Livestock	Pig	Swine; rectal swab	2012			Europe	Germany				PRJEB33780	ERR3465661	Frentrup2020	68	4043838	141073	pass
SAMEA5846568	CD-18-00514	11	78	npmA2	Livestock	Pig	Swine; rectal swab	2012			Europe	Germany				PRJEB33780	ERR3465659	Frentrup2020	70	4029009	128544	pass
SAMEA5846657	CD-18-00419	11	78		Livestock	Pig	Swine; rectal swab	2012			Europe	Germany				PRJEB33780	ERR3465651	Frentrup2020	84	4066084	134060	pass
SAMEA5846658	CD-18-00418	11	78		Livestock	Pig	Swine; rectal swab	2012			Europe	Germany				PRJEB33780	ERR3465648	Frentrup2020	71	4025317	134103	pass
SAMEA5846564	CD-18-00518	11	78	npmA2	Livestock	Pig	Swine; rectal swab	2012			Europe	Germany				PRJEB33780	ERR3465641	Frentrup2020	91	4018747	95104	pass
SAMEA5846700	CD-18-00336	11	78		Livestock	Pig	Swine; rectal swab	2012			Europe	Germany				PRJEB33780	ERR3465640	Frentrup2020	112	4121540	101529	pass
SAMEA5846565	CD-18-00517	11	78	npmA2	Livestock	Pig	Swine; rectal swab	2012			Europe	Germany				PRJEB33780	ERR3465639	Frentrup2020	90	4018572	97479	pass
SAMEA5846588	CD-18-00488	11	126		Livestock	Pig	Swine; rectal swab	2012			Europe	Germany				PRJEB33780	ERR3465637	Frentrup2020	96	4050782	125632	pass
SAMEA5846589	CD-18-00487	11	126		Livestock	Pig	Swine; rectal swab	2012			Europe	Germany				PRJEB33780	ERR3465635	Frentrup2020	96	4050539	125628	pass
SAMEA5846617	CD-18-00459	11	126		Livestock	Pig	Swine; rectal swab	2012			Europe	Germany				PRJEB33780	ERR3465634	Frentrup2020	78	4009730	134463	pass
SAMEA5846590	CD-18-00486	11	126		Livestock	Pig	Swine; rectal swab	2012			Europe	Germany				PRJEB33780	ERR3465633	Frentrup2020	96	4048923	125628	pass
SAMEA5846701	CD-18-00335	11	78		Livestock	Pig	Swine; rectal swab	2012			Europe	Germany				PRJEB33780	ERR3465631	Frentrup2020	120	4123338	95794	pass
SAMEA5843186	CD-15-00686	11	126		Human	Human	Homo sapiens; stool sample	2014			Europe	Germany				PRJEB33779	ERR3465381	Frentrup2020	90	4001602	133754	pass
SAMN14265979	CD07814	11		npmA1	Human	Human	Homo sapiens; stool	2017			North America	United States	Pennsylvania	Allegheny County	Pittsburgh	PRJNA224116		Haft2018	6	4226733	4180658	pass
SAMEA3664029	VL_0039	11														PRJNA224116		Haft2018	946	3977935	62679	fail
SAMEA3664205	VL_0215	11														PRJNA224116		Haft2018	1376	3978668	30170	fail
CLO_EA4238AA_AS	SMG-20-806	11	10		Human	Human		2020			Europe	United Kingdom	Scotland					no_study	78	3877184	141007	pass
SAMN15802668	20130329	11			Human	Human	Homo sapiens; stool	2013			North America	United States				PRJNA629351	SRR12437174	Gargis2023	64	3857667	163472	pass
SAMN15802778	20140101	11			Human	Human	Homo sapiens; Frozen stool	2014			North America	United States				PRJNA629351	SRR12437375	Gargis2023	69	3954045	163571	pass
SAMN15802650	20121669	11			Human	Human	Homo sapiens; Frozen Stool	2012			North America	United States				PRJNA629351	SRR12437378	Gargis2023	74	3968491	125608	pass
SAMN15802738	20131779	11			Human	Human	Homo sapiens; swab	2013			North America	United States				PRJNA629351	SRR12437419	Gargis2023	70	3856081	134069	pass
SAMN15802704	20131214	11			Human	Human	Homo sapiens; Frozen Stool	2013			North America	United States				PRJNA629351	SRR12437455	Gargis2023	93	4198945	141100	pass
SAMN15803049	20161317	11			Human	Human	Homo sapiens; stool	2016			North America	United States				PRJNA629351	SRR12437540	Gargis2023	75	3857253	147343	pass
CLO_EA6001AA_AS	SIRN_SA-019	11	78	npmA2	Human	Human		2014			Europe	United Kingdom	Scotland					no_study	52	3919880	162798	pass
CLO_EA6072AA_AS	SIRN_OT-003	11	78		Human	Human		2014			Europe	United Kingdom	Scotland					no_study	47	3959930	229752	pass
CLO_EA6157AA_AS	SIRN_TAY-047	11	126		Human	Human		2009			Europe	United Kingdom	Scotland					no_study	52	4120625	243816	pass
CLO_EA6160AA_AS	SIRN_TAY-028	11	126		Human	Human		2009			Europe	United Kingdom	Scotland					no_study	50	4019954	187807	pass
CLO_EA6166AA_AS	SIRN_TAY-072	11	126		Human	Human		2009			Europe	United Kingdom	Scotland					no_study	59	4231151	258586	pass
SAMN13838737	PFECD0081	11			Human	Human	Homo sapiens; stool	2009								PRJNA600974	SRR10881502	Li2020	79	4096561	150196	pass
SAMN13838720	PFECD0113	11			Human	Human	Homo sapiens; stool	2016								PRJNA600974	SRR10881521	Li2020	66	4014440	163472	pass
SAMN13838705	PFECD0082	11			Human	Human	Homo sapiens; stool	2015								PRJNA600974	SRR10881538	Li2020	68	3991370	162825	pass
SAMN13838703	PFECD0115	11			Human	Human	Homo sapiens; stool	2015								PRJNA600974	SRR10881540	Li2020	70	3991227	162841	pass
SAMN13838637	PFECD0394	11			Human	Human	Homo sapiens; stool	2016								PRJNA600974	SRR10881306	Li2020	76	4296198	180537	pass
SAMN13838636	PFECD0441	11			Human	Human	Homo sapiens; stool	2016								PRJNA600974	SRR10881307	Li2020	77	4042710	140881	pass
SAMN13838635	PFECD0386	11			Human	Human	Homo sapiens; stool	2016								PRJNA600974	SRR10881309	Li2020	49	4039706	187786	pass
SAMN13838633	PFECD0365	11			Human	Human	Homo sapiens; stool	2016								PRJNA600974	SRR10881311	Li2020	97	4029521	141147	pass
SAMN13838631	PFECD0362	11			Human	Human	Homo sapiens; stool	2016								PRJNA600974	SRR10881313	Li2020	101	4073826	134606	pass
SAMN13838630	PFECD0496	11			Human	Human	Homo sapiens; stool	2016								PRJNA600974	SRR10881314	Li2020	67	4133676	152774	pass
SAMN13838384	PFECD0028	11			Human	Human	Homo sapiens; stool	2005								PRJNA600974	SRR10881411	Li2020	74	3934794	134068	pass
SAMN13838550	PFECD0354	11			Human	Human	Homo sapiens; stool	2016								PRJNA600974	SRR10881432	Li2020	84	4020280	134590	pass
SAMN13838393	PFECD0038	11			Human	Human	Homo sapiens; stool	2007								PRJNA600974	SRR10881110	Li2020	64	4023140	180982	pass
SAMN13838842	PFECD0034	11			Human	Human	Homo sapiens; stool	2010								PRJNA600974	SRR10881164	Li2020	61	4254108	200831	pass
SAMN13639051	CIM-345	11			Human	Human	Homo sapiens; stool	2016			North America	United States				PRJNA590803	SRR10869530	no_study	45	3890385	188230	pass
SAMN13639028	CIM-319	11			Human	Human	Homo sapiens; stool	2016			North America	United States				PRJNA590803	SRR10869555	no_study	48	3888004	188230	pass
SAMN13638910	CIM-170	11			Human	Human	Homo sapiens; stool	2016			North America	United States				PRJNA590803	SRR10869683	no_study	66	3963759	147345	pass
SAMN16556859	HA44	11			Human	Human	Homo sapiens; stool	2017			North America	United States	New York			PRJNA672122	SRR12905044	Kamboj2021	85	4002089	80390	pass
SAMN15907426	M2016019799	11			Human	Human	Homo sapiens; Age: 97; male; stool	2016	11	9	North America	United States	New York	Monroe		PRJNA659471	SRR12520723	Pecora2022	88	3881291	125602	pass
SAMN17813469	MMMOSAM:b65963f3-7bfb-457f-9b95-141ee7a731c8	11			Human	Human	Homo sapiens; clinical sample	2015	3	27	Europe	United Kingdom	Wales			PRJNA412541	SRR13642570	Eyre2019	69	4037730	152537	pass
SAMN17813511	MMMOSAM:992a38b8-0539-4664-91eb-1c1b4849d857	11			Human	Human	Homo sapiens; clinical sample	2015	2	18	Europe	United Kingdom	Wales			PRJNA412541	SRR13642274	Eyre2019	68	3881230	152818	pass
SAMN17813531	MMMOSAM:877ba8f2-c8bc-4945-8cec-2ccdd14e7e85	11			Human	Human	Homo sapiens; clinical sample	2015	2	2	Europe	United Kingdom	Wales			PRJNA412541	SRR13642294	Eyre2019	68	4058906	152818	pass
SAMN17813552	MMMOSAM:733a924a-5a3a-4961-a90a-ccf36eaf869b	11			Human	Human	Homo sapiens; clinical sample	2015	3	2	Europe	United Kingdom	Wales			PRJNA412541	SRR13642315	Eyre2019	57	4059038	186702	pass
SAMN17813654	MMMOSAM:2e52d38c-42a6-4cbf-9a43-7a80c77ed012	11			Human	Human	Homo sapiens; clinical sample	2015	2	1	Europe	United Kingdom	Wales			PRJNA412541	SRR13642417	Eyre2019	71	4025964	152818	pass
SAMN17813701	MMMOSAM:0a872b35-dd15-4535-8f1b-773fba8e0efb	11			Human	Human	Homo sapiens; clinical sample	2015	2	23	Europe	United Kingdom	Wales			PRJNA412541	SRR13642464	Eyre2019	70	4057667	147278	pass
SAMEA8389060	302488-18	11			Human	Human	Homo sapiens; clinical sample	2018	5		Europe	Switzerland				PRJEB43401	ERR5523423	Seth-Smith2021	71	4025011	147345	pass
SAMEA8389154	306530-18	11			Human	Human	Homo sapiens; clinical sample	2018	11		Europe	Switzerland				PRJEB43401	ERR5523412	Seth-Smith2021	64	3914321	147485	pass
SAMEA8389126	304936-Mo1-17	11			Human	Human	Homo sapiens; clinical sample	2017	10		Europe	Switzerland				PRJEB43401	ERR5523400	Seth-Smith2021	77	4093760	134068	pass
SAMEA8389026	301699-18	11			Human	Human	Homo sapiens; clinical sample	2018	4		Europe	Switzerland				PRJEB43401	ERR5523384	Seth-Smith2021	77	3857988	147481	pass
SAMEA8389017	301297-18	11			Human	Human	Homo sapiens; clinical sample	2018	3		Europe	Switzerland				PRJEB43401	ERR5523381	Seth-Smith2021	61	3848293	152818	pass
SAMEA8389113	304453-17	11			Human	Human	Homo sapiens; clinical sample	2017	9		Europe	Switzerland				PRJEB43401	ERR5523360	Seth-Smith2021	64	3892024	152818	pass
SAMEA8389068	302862-17	11			Human	Human	Homo sapiens; clinical sample	2017	6		Europe	Switzerland				PRJEB43401	ERR5523355	Seth-Smith2021	72	4065365	152818	pass
SAMEA8389028	301729-17	11			Human	Human	Homo sapiens; clinical sample	2017	4		Europe	Switzerland				PRJEB43401	ERR5523349	Seth-Smith2021	63	3848393	147347	pass
SAMEA8389076	303068-20	11			Human	Human	Homo sapiens; clinical sample	2020	7		Europe	Switzerland				PRJEB43517	ERR5523304	Büchler2022	81	4091571	133236	pass
SAMEA8389065	302652-20	11			Human	Human	Homo sapiens; clinical sample	2020	6		Europe	Switzerland				PRJEB43517	ERR5523301	Büchler2022	65	3848076	147354	pass
SAMEA8389104	304190-19	11			Human	Human	Homo sapiens; clinical sample	2019	7		Europe	Switzerland				PRJEB43517	ERR5523275	Büchler2022	65	3926386	141022	pass
SAMEA8389049	302339-20	11			Human	Human	Homo sapiens; clinical sample	2020	5		Europe	Switzerland				PRJEB43517	ERR5523269	Büchler2022	80	4089911	125652	pass
SAMEA8389040	302200-weissMo2-19	11			Human	Human	Homo sapiens; clinical sample	2019	4		Europe	Switzerland				PRJEB43517	ERR5523266	Büchler2022	69	4011916	163196	pass
SAMEA8389050	302356-20	11			Human	Human	Homo sapiens; clinical sample	2020	5		Europe	Switzerland				PRJEB43517	ERR5523242	Büchler2022	76	4091198	133235	pass
SAMEA8389001	300965-19	11			Human	Human	Homo sapiens; clinical sample	2019	3		Europe	Switzerland				PRJEB43517	ERR5523239	Büchler2022	62	3954858	147336	pass
SAMEA8388992	300808-20	11			Human	Human	Homo sapiens; clinical sample	2020	2		Europe	Switzerland				PRJEB43517	ERR5523226	Büchler2022	71	3849795	147355	pass
SAMEA8389024	301608-20	11			Human	Human	Homo sapiens; clinical sample	2020	3		Europe	Switzerland				PRJEB43517	ERR5523223	Büchler2022	66	3855180	152818	pass
CLO_EA9790AA_AS	425ZY	11						2021										no_study	209	3990615	43214	fail
SAMN19613651	ZZV18-9385	11			Environment	Plant	vegetables-potato	2018	6	9	Europe	Poland				PRJNA736231	SRR14766177	Tkalec2022	64	4028208	203265	pass
SAMN19613678	ZZV18-9134	11			Environment	Plant	vegetables-potato	2018	2	10	Europe	Austria				PRJNA736231	SRR14766184	Tkalec2022	71	4014129	147338	pass
SAMN19613677	ZZV18-9318	11			Environment	Plant	vegetables-potato	2018	4	14	Europe	Italy				PRJNA736231	SRR14766185	Tkalec2022	78	4034719	125608	pass
SAMN20110657	2021EL-01134	11			Human	Human	Homo sapiens; stool	2020			North America	United States				PRJNA629351	SRR15066520	Gargis2023	122	4052219	70979	pass
SAMN20110620	2021EL-01095	11			Human	Human	Homo sapiens; stool	2020			North America	United States				PRJNA629351	SRR15066561	Gargis2023	126	4097870	78085	pass
SAMN20110278	2021EL-00660	11			Human	Human	Homo sapiens; stool	2016			North America	United States				PRJNA629351	SRR15066177	Gargis2023	91	3880950	125602	pass
SAMN20110039	2021EL-00406	11			Human	Human	Homo sapiens; stool	2015			North America	United States				PRJNA629351	SRR15066442	Gargis2023	59	3944097	229120	pass
SAMN20110586	2021EL-01061	11			Human	Human	Homo sapiens; stool	2020			North America	United States				PRJNA629351	SRR15066487	Gargis2023	89	4047193	93235	pass
SAMN20109905	2021EL-00222	11			Human	Human	Homo sapiens; stool	2012			North America	United States				PRJNA629351	SRR15065916	Gargis2023	62	3882591	165725	pass
SAMN20110078	2021EL-00451	11			Human	Human	Homo sapiens; stool	2015			North America	United States				PRJNA629351	SRR15066068	Gargis2023	93	4040336	125602	pass
CLO_FA2473AA_AS	SMG-21-1498	11	78		Human	Human		2021	8		Europe	United Kingdom	Scotland					no_study	94	3945078	139563	pass
CLO_FA2483AA_AS	SMG-21-1570	11	78		Human	Human		2021	8		Europe	United Kingdom	Scotland					no_study	65	4047610	148987	pass
CLO_FA2486AA_AS	SMG-21-1546	11	78	npmA2	Human	Human		2021	8		Europe	United Kingdom	Scotland					no_study	64	3956033	159450	pass
CLO_FA2504AA_AS	SMG-21-1590	11	78		Human	Human		2021	8		Europe	United Kingdom	Scotland					no_study	71	3858030	140684	pass
SAMN21385843	2021EL-01167	11			Human	Human	Homo sapiens; stool	2020			North America	United States				PRJNA629351	SRR15838405	Gargis2023	58	3848876	152818	pass
SAMN22067675	2021EL-01208	11			Human	Human	Homo sapiens; stool	2019			North America	United States				PRJNA629351	SRR16212148	Gargis2023	63	4053752	163002	pass
CLO_FA2602AA_AS	SMG-21-1760	11	78		Human	Human		2021	9		Europe	United Kingdom	Scotland					no_study	70	3878754	163472	pass
CLO_FA2612AA_AS	SMG-21-1774	11	78	npmA2	Human	Human		2021	9		Europe	United Kingdom	Scotland					no_study	80	4103909	148374	pass
CLO_FA2621AA_AS	SMG-21-1789	11	78	npmA2	Human	Human		2021	9		Europe	United Kingdom	Scotland					no_study	60	3956497	147345	pass
CLO_FA2624AA_AS	SMG-21-1795	11	78	npmA2	Human	Human		2021	9		Europe	United Kingdom	Scotland					no_study	82	3957362	132852	pass
SAMN24116306	2021EL-01300	11			Human	Human	Homo sapiens; stool	2009			North America	United States				PRJNA629351	SRR17247687	Gargis2023	62	3911284	152818	pass
CLO_FA3138AA_AS	SMG-21-2235	11	78	npmA2	Human	Human		2021	7		Europe	United Kingdom	Scotland					no_study	68	3956612	147343	pass
CLO_FA3258AA_AS	SMG-21-2294	11	78		Human	Human		2021	12		Europe	United Kingdom	Scotland					no_study	72	3877342	162797	pass
CLO_FA3263AA_AS	SMG-21-2287	11	78	npmA2	Human	Human		2021	12		Europe	United Kingdom	Scotland					no_study	70	4132735	140881	pass
CLO_FA3267AA_AS	SMG-21-2283	11	78		Human	Human		2021	12		Europe	United Kingdom	Scotland					no_study	67	3953911	147794	pass
CLO_FA3273AA_AS	SMG-21-2327	11	78	npmA2	Human	Human		2021	12		Europe	United Kingdom	Scotland					no_study	72	3957197	134068	pass
CLO_FA3276AA_AS	SMG-21-2325	11	126		Human	Human		2021	12		Europe	United Kingdom	Scotland					no_study	80	4010133	147345	pass
CLO_FA3279AA_AS	SMG-21-2323	11	126		Human	Human		2021	12		Europe	United Kingdom	Scotland					no_study	102	4013397	109174	pass
CLO_FA3284AA_AS	SMG-21-2317	11	126		Laboratory	Laboratory	EQA				Europe	United Kingdom	Scotland					no_study	84	4041103	147343	pass
SAMN24811766	0000-0081-4862	11			Human	Human	Homo sapiens; stool	2017			North America	United States	Massachusetts	Suffolk County	Boston	PRJNA278886	SRR17540912	Nudel2018	71	3954217	152818	pass
SAMN24811685	0000-0081-4521	11			Human	Human	Homo sapiens; stool	2017			North America	United States	Massachusetts	Suffolk County	Boston	PRJNA278886	SRR17540954	Nudel2018	52	3964252	188249	pass
CLO_FA3417AA_AS	SMG-22-103	11	78	npmA2	Human	Human		2022	1		Europe	United Kingdom	Scotland					no_study	60	3963429	200044	pass
CLO_FA3422AA_AS	SMG-22-131	11	78		Human	Human		2022	1		Europe	United Kingdom	Scotland					no_study	62	3976912	162797	pass
CLO_FA3481AA_AS	SMG-22-173	11	78		Human	Human		2022	1		Europe	United Kingdom	Scotland					no_study	74	3979539	140881	pass
CLO_FA3482AA_AS	SMG-22-165	11	126		Human	Human		2022	1		Europe	United Kingdom	Scotland					no_study	93	4014256	140881	pass
CLO_FA3491AA_AS	SMG-22-213	11	78	npmA2	Human	Human		2022	2		Europe	United Kingdom	Scotland					no_study	62	3955689	147338	pass
CLO_FA3530AA_AS	SMG-22-291	11	78	npmA2	Human	Human		2022	2		Europe	United Kingdom	Scotland					no_study	91	3966711	128844	pass
CLO_FA3567AA_AS	SMG-22-334	11	78		Human	Human		2022	2		Europe	United Kingdom	Scotland					no_study	65	3882690	152773	pass
CLO_FA3569AA_AS	SMG-22-341	11	126		Human	Human		2022	2		Europe	United Kingdom	Scotland					no_study	112	4191001	113437	pass
CLO_FA3583AA_AS	SMG-22-360	11									Europe	United Kingdom	Scotland					no_study	67	3978458	141100	pass
CLO_FA3763AA_AS	SMG-22-540	11									Europe	United Kingdom	Scotland					no_study	68	3979620	141007	pass
CLO_FA3765AA_AS	SMG-22-514	11									Europe	United Kingdom	Scotland					no_study	73	3980562	147636	pass
SAMN27515079	2020HQ-00060	11			Human	Human	Homo sapiens; swab	2017			North America	United States				PRJNA629351	SRR18709740	Gargis2023	64	3913751	134026	pass
SAMN27515055	2020HQ-00034	11			Human	Human	Homo sapiens; stool	2017			North America	United States				PRJNA629351	SRR18709766	Gargis2023	102	3947415	87658	pass
SAMN27515043	2020HQ-00022	11			Human	Human	Homo sapiens; swab	2017			North America	United States				PRJNA629351	SRR18709780	Gargis2023	68	3860730	141172	pass
SAMN27515040	2020HQ-00019	11			Human	Human	Homo sapiens; stool	2017			North America	United States				PRJNA629351	SRR18709783	Gargis2023	91	3879635	99373	pass
CLO_FA3989AA_AS	SMG-22-580	11									Europe	United Kingdom	Scotland					no_study	71	3979574	152818	pass
CLO_FA4264AA_AS	SMG-22-770	11			Human	Human		2022	5		Europe	United Kingdom	Scotland					no_study	64	3876354	148371	pass
CLO_FA4354AA_AS	SMG-22-852	11			Human	Human		2022	5		Europe	United Kingdom	Scotland					no_study	75	3899151	133735	pass
CLO_FA4355AA_AS	SMG-22-858	11		npmA2	Human	Human		2022	5		Europe	United Kingdom	Scotland					no_study	70	3956502	149040	pass
CLO_FA4375AA_AS	SMG-22-923	11		npmA2							Europe	United Kingdom	Scotland					no_study	90	3958650	126109	pass
CLO_FA4403AA_AS	SMG-22-946	11									Europe	United Kingdom	Scotland					no_study	68	4074380	148972	pass
CLO_FA4404AA_AS	SMG-22-927	11									Europe	United Kingdom	Scotland					no_study	64	3926292	162797	pass
CLO_FA4496AA_AS	SMG-22-1090	11									Europe	United Kingdom	Scotland					no_study	64	4034214	147505	pass
SAMN29614005	2022EL-00667	11		npmA2	Human	Human	Homo sapiens; stool	2020			North America	United States				PRJNA629351	SRR20063646	Gargis2023	86	4370406	163571	pass
CLO_FA4578AA_AS	SMG-22-1184	11			Human	Human					Europe	United Kingdom	Scotland					no_study	76	3878313	152391	pass
CLO_FA4621AA_AS	SMG-22-1301	11			Human	Human					Europe	United Kingdom	Scotland					no_study	69	3877790	152775	pass
SAMEA110473762	SAT16-85	11			Human	Human	Homo sapiens; human feces	2016			Europe	France				PRJEB54703	ERR10039498	Courbin2022	70	4010320	140881	pass
SAMEA110473739	SAT16-59	11		npmA1	Human	Human	Homo sapiens; human feces	2016			Europe	France				PRJEB54703	ERR10039475	Courbin2022	87	4097256	141741	pass
SAMEA110473667	SAT16-180-1	11			Human	Human	Homo sapiens; human feces	2016			Europe	France				PRJEB54703	ERR10039403	Courbin2022	69	4027135	147346	pass
SAMEA110473665	SAT16-179	11			Human	Human	Homo sapiens; human feces	2016			Europe	France				PRJEB54703	ERR10039401	Courbin2022	77	4029514	145913	pass
SAMEA110473604	SAT16-112	11			Human	Human	Homo sapiens; human feces	2016			Europe	France				PRJEB54703	ERR10039340	Courbin2022	65	4010198	141022	pass
CLO_FA5155AA_AS	SMG-22-1423	11			Human	Human					Europe	United Kingdom	Scotland					no_study	88	4028823	138745	pass
CLO_FA5291AA_AS	D19MD261	11	126		Environment	Plant	Biogas plant	2019			Europe	France						no_study	61	4052767	152738	pass
CLO_FA5292AA_AS	D19MD264	11	126		Environment	Plant	Biogas plant	2019			Europe	France						no_study	66	4053251	152818	pass
CLO_FA5293AA_AS	D19MD270	11	126		Environment	Plant	Biogas plant	2019			Europe	France						no_study	61	4194396	152818	pass
CLO_FA5318AA_AS	D19MD408	11	126		Environment	Plant	Biogas plant	2019			Europe	France						no_study	181	4053240	45973	pass
CLO_FA5324AA_AS	D19MD342	11	126		Environment	Plant	Biogas plant	2019			Europe	France						no_study	61	4051870	152725	pass
SAMN31426476	2022EL-00914	11		npmA2	Human	Human	Homo sapiens; stool	2020			North America	United States				PRJNA629351	SRR22020516	Gargis2023	76	4079793	163571	pass
SAMEA112130436	cdifficile_38604	11			Human	Human	Homo Sapiens; Stool	2021	4	5	Europe	Switzerland				PRJEB56399	ERR10483895	Filippidis2023	93	4053534	108211	pass
SAMN32092645	2022EL-00990	11			Human	Human	Homo sapiens; stool	2020			North America	United States				PRJNA629351	SRR22561339	Gargis2023	59	3847398	148881	pass
SAMN32115919	2022EL-01050	11			Human	Human	Homo sapiens; stool	2020			North America	United States				PRJNA629351	SRR22578160	Gargis2023	68	4155258	180594	pass
SAMN34353000	2023EL-00177	11			Human	Human	Homo sapiens; stool	2019			North America	United States				PRJNA629351	SRR24286944	Gargis2023	67	3871218	152775	pass
SAMN34421665	2023EL-00384	11			Human	Human	Homo sapiens; stool	2020			North America	United States				PRJNA629351	SRR24338457	Gargis2023	63	3846282	152818	pass
SAMN34421661	2023EL-00380	11			Human	Human	Homo sapiens; stool	2020			North America	United States				PRJNA629351	SRR24338461	Gargis2023	59	3934482	163571	pass
SAMN34421620	2023EL-00338	11			Human	Human	Homo sapiens; stool	2019			North America	United States				PRJNA629351	SRR24338506	Gargis2023	66	3876326	152818	pass
SAMN34421580	2023EL-00296	11			Human	Human	Homo sapiens; stool	2020			North America	United States				PRJNA629351	SRR24338511	Gargis2023	64	4153270	165632	pass
SAMN34421613	2023EL-00331	11			Human	Human	Homo sapiens; stool	2019			North America	United States				PRJNA629351	SRR24338514	Gargis2023	64	3874879	162796	pass
SAMN34421609	2023EL-00327	11			Human	Human	Homo sapiens; stool	2019			North America	United States				PRJNA629351	SRR24338518	Gargis2023	62	3875749	180565	pass
SAMN34409536	2023EL-00289	11			Human	Human	Homo sapiens; stool	2019			North America	United States				PRJNA629351	SRR24326456	Gargis2023	63	3876099	152818	pass
SAMN34409532	2023EL-00285	11			Human	Human	Homo sapiens; stool	2019			North America	United States				PRJNA629351	SRR24326460	Gargis2023	63	3875964	141007	pass
SAMN32366355	L,16.7569864	11	78		Human	Human	Homo sapiens; feces				Europe	Switzerland				PRJNA914992	SRR22862760	Olaitan2023	262	3838204	31120	fail
SAMN32366346	L,15.7104489	11			Human	Human	Homo sapiens; feces	2016			Europe	Spain				PRJNA914992	SRR22862769	Olaitan2023	112	4059073	93882	pass
SAMN32366334	L,15.7104057	11			Human	Human	Homo sapiens; feces	2014			Europe	United Kingdom				PRJNA914992	SRR22862783	Olaitan2023	100	4022774	93882	pass
SAMN32366300	L,13.7933876	11			Human	Human	Homo sapiens; feces	2013			Europe	United Kingdom				PRJNA914992	SRR22862821	Olaitan2023	102	3900259	93878	pass
SAMN32366134	23381	11	78		Human	Human	Homo sapiens; feces									PRJNA914992	SRR22863027	Olaitan2023	152	3840507	59911	pass
SAMN32366130	MT2717	11			Human	Human	Homo sapiens; feces	2014	11		North America	United States				PRJNA914992	SRR22863031	Olaitan2023	91	3846796	108382	pass
SAMN29256601	MMMOSAM:c856506d-aa02-4a37-9ada-a545937be9a8	11		npmA2	Human	Human	Homo sapiens; clinical sample	2010	5	10	Europe	United Kingdom				PRJNA318370	SRR19789563	Stoesser2017	58	3954755	134081	pass
SAMN29256752	MMMOSAM:404d0344-d8b5-4850-ba51-e5ed6ee03d97	11			Human	Human	Homo sapiens; clinical sample				Europe	United Kingdom				PRJNA318370	SRR19789602	Stoesser2017	66	3913746	141020	pass
SAMN29256703	MMMOSAM:686f524d-8947-4a60-9056-a0cef1c06448	11			Human	Human	Homo sapiens; clinical sample	2006	10	19	Europe	United Kingdom				PRJNA318370	SRR19789693	Stoesser2017	174	3994077	51997	pass
SAMN29256707	MMMOSAM:65f0277c-87ad-4044-96a0-a1baa0f8e3cf	11			Human	Human	Homo sapiens; clinical sample				Europe	United Kingdom				PRJNA318370	SRR19789697	Stoesser2017	58	3916971	164625	pass
SAMN29256784	MMMOSAM:2ab9cca3-8ee6-4ee1-8363-f88ca697ed2d	11			Human	Human	Homo sapiens; clinical sample				Europe	United Kingdom				PRJNA318370	SRR19789718	Stoesser2017	69	3914742	152818	pass
SAMN29256799	MMMOSAM:1e860987-e8af-4b2c-9bff-6274e34932a1	11			Human	Human	Homo sapiens; clinical sample				Europe	United Kingdom				PRJNA318370	SRR19789733	Stoesser2017	91	3924524	92834	pass
SAMN25516600	RT78	11			Human	Human	Homo sapiens; Human infection				Europe	United Kingdom				PRJNA762697	SRR17630973	Moore2022	44	3881791	210515	pass
SAMN25516607	RT78	11			Human	Human	Homo sapiens; Human infection	2013	8	19	Europe	United Kingdom				PRJNA762697	SRR17631201	Moore2022	95	3943093	80298	pass
SAMN25516611	RT78	11			Human	Human	Homo sapiens; Human infection	2016	1	11	Europe	United Kingdom				PRJNA762697	SRR17631205	Moore2022	92	3865517	133750	pass
SAMN25516625	RT78	11			Human	Human	Homo sapiens; Human infection				Europe	United Kingdom				PRJNA762697	SRR17631219	Moore2022	53	3999746	186993	pass
SAMN25516628	RT78	11			Human	Human	Homo sapiens; Human infection				Europe	United Kingdom				PRJNA762697	SRR17631222	Moore2022	50	3882310	210515	pass
SAMN25516644	RT78	11			Human	Human	Homo sapiens; Human infection				Europe	United Kingdom				PRJNA762697	SRR17631238	Moore2022	46	4001174	210515	pass
SAMN25516650	RT78	11			Human	Human	Homo sapiens; Human infection	2013	8	19	Europe	United Kingdom				PRJNA762697	SRR17631244	Moore2022	83	3942707	88604	pass
SAMN25516651	RT78	11			Human	Human	Homo sapiens; Human infection				Europe	United Kingdom				PRJNA762697	SRR17631245	Moore2022	43	3851347	253729	pass
SAMN25516667	RT78	11			Human	Human	Homo sapiens; Human infection				Europe	Ireland				PRJNA762697	SRR17631261	Moore2022	95	3919715	113995	pass
SAMN25516819	RT78	11			Human	Human	Homo sapiens; Human infection				Europe	United Kingdom				PRJNA762697	SRR17631273	Moore2022	44	4035643	163472	pass
SAMN25516835	RT78	11			Human	Human	Homo sapiens; Human infection				Europe	United Kingdom				PRJNA762697	SRR17631289	Moore2022	51	3879793	181764	pass
SAMN25516887	RT78	11			Human	Human	Homo sapiens; Human infection	2015	1	5	Europe	United Kingdom				PRJNA762697	SRR17631313	Moore2022	78	3923113	134125	pass
SAMN25516892	RT78	11		npmA2	Human	Human	Homo sapiens; Human infection				Europe	United Kingdom				PRJNA762697	SRR17631318	Moore2022	48	3915894	211900	pass
SAMN25516953	RT78	11			Human	Human	Homo sapiens; Human infection				Europe	United Kingdom				PRJNA762697	SRR17631323	Moore2022	46	3877744	181671	pass
SAMN25516972	RT78	11			Human	Human	Homo sapiens; Human infection				Europe	United Kingdom				PRJNA762697	SRR17631342	Moore2022	52	3844261	187751	pass
SAMN25516973	RT78	11		npmA2	Human	Human	Homo sapiens; Human infection				Europe	United Kingdom				PRJNA762697	SRR17631343	Moore2022	61	3960517	162796	pass
SAMN25517035	RT78	11			Human	Human	Homo sapiens; Human infection				Europe	Ireland				PRJNA762697	SRR17631349	Moore2022	95	3870770	101856	pass
SAMN25517042	RT78	11			Human	Human	Homo sapiens; Human infection				Europe	United Kingdom				PRJNA762697	SRR17631356	Moore2022	42	3859084	228552	pass
SAMN25517057	RT78	11			Human	Human	Homo sapiens; Human infection				Europe	United Kingdom				PRJNA762697	SRR17631371	Moore2022	44	3847147	187607	pass
SAMN25516698	RT78	11			Human	Human	Homo sapiens; Human infection				Europe	United Kingdom				PRJNA762697	SRR17631001	Moore2022	43	3846130	229540	pass
SAMN25516701	RT78	11		npmA2	Human	Human	Homo sapiens; Human infection				Europe	United Kingdom				PRJNA762697	SRR17631379	Moore2022	52	3964375	194716	pass
SAMN25516703	RT78	11		npmA2	Human	Human	Homo sapiens; Human infection				Europe	United Kingdom				PRJNA762697	SRR17631381	Moore2022	56	3961075	163571	pass
SAMN25516705	RT78	11			Human	Human	Homo sapiens; Human infection				Europe	United Kingdom				PRJNA762697	SRR17631383	Moore2022	48	4038160	187744	pass
SAMN25516706	RT78	11			Human	Human	Homo sapiens; Human infection				Europe	United Kingdom				PRJNA762697	SRR17631384	Moore2022	47	3899725	228402	pass
SAMN25516712	RT78	11			Human	Human	Homo sapiens; Human infection				Europe	United Kingdom				PRJNA762697	SRR17631390	Moore2022	43	3924776	229668	pass
SAMN25516723	RT78	11			Human	Human	Homo sapiens; Human infection				Europe	United Kingdom				PRJNA762697	SRR17631401	Moore2022	44	3880939	187765	pass
SAMN25516791	RT78	11		npmA2	Human	Human	Homo sapiens; Human infection	2016	2	5	Europe	United Kingdom				PRJNA762697	SRR17631413	Moore2022	104	3958458	121383	pass
SAMN25516797	RT78	11			Human	Human	Homo sapiens; Human infection	2016	1	6	Europe	United Kingdom				PRJNA762697	SRR17631419	Moore2022	95	3866416	127065	pass
SAMN25516924	RT78	11			Human	Human	Homo sapiens; Human infection				Europe	United Kingdom				PRJNA762697	SRR17631434	Moore2022	51	3941338	162797	pass
SAMN25516938	RT78	11		npmA2	Human	Human	Homo sapiens; Human infection				Europe	United Kingdom				PRJNA762697	SRR17631448	Moore2022	46	3954092	229712	pass
SAMN25516939	RT78	11			Human	Human	Homo sapiens; Human infection				Europe	United Kingdom				PRJNA762697	SRR17631449	Moore2022	51	3871169	196074	pass
SAMN25516940	RT78	11			Human	Human	Homo sapiens; Human infection	2015	3	6	Europe	United Kingdom				PRJNA762697	SRR17631450	Moore2022	70	3949677	147476	pass
SAMN25516942	RT78	11			Human	Human	Homo sapiens; Human infection				Europe	United Kingdom				PRJNA762697	SRR17631452	Moore2022	47	3954499	229752	pass
SAMN25516949	RT78	11			Human	Human	Homo sapiens; Human infection				Europe	United Kingdom				PRJNA762697	SRR17631459	Moore2022	53	3878078	163571	pass
SAMN25517012	RT78	11			Human	Human	Homo sapiens; Human infection	2015	7	24	Europe	United Kingdom				PRJNA762697	SRR17631466	Moore2022	69	3903368	140877	pass
SAMN25517015	RT78	11			Human	Human	Homo sapiens; Human infection	2013	8	19	Europe	United Kingdom				PRJNA762697	SRR17631469	Moore2022	95	3950662	87065	pass
SAMN25517025	RT78	11			Human	Human	Homo sapiens; Human infection	2016	2	20	Europe	United Kingdom				PRJNA762697	SRR17631479	Moore2022	96	3871021	125595	pass
SAMN25516732	RT78	11			Human	Human	Homo sapiens; Human infection				Europe	United Kingdom				PRJNA762697	SRR17631007	Moore2022	53	3869429	163472	pass
SAMN25516548	RT78	11			Human	Human	Homo sapiens; Human infection				Europe	United Kingdom				PRJNA762697	SRR17631059	Moore2022	48	3893789	187607	pass
SAMN25516549	RT78	11			Human	Human	Homo sapiens; Human infection				Europe	United Kingdom				PRJNA762697	SRR17631060	Moore2022	50	3878108	187756	pass
SAMN25516557	RT78	11			Human	Human	Homo sapiens; Human infection	2016	2	10	Europe	United Kingdom				PRJNA762697	SRR17631068	Moore2022	94	3874369	127065	pass
SAMN25516569	RT78	11			Human	Human	Homo sapiens; Human infection	2016	1	20	Europe	United Kingdom				PRJNA762697	SRR17631080	Moore2022	96	3866881	127065	pass
SAMN25516571	RT78	11			Human	Human	Homo sapiens; Human infection				Europe	United Kingdom				PRJNA762697	SRR17631082	Moore2022	54	3852778	162884	pass
SAMN25516757	RT78	11			Human	Human	Homo sapiens; Human infection				Europe	Ireland				PRJNA762697	SRR17631100	Moore2022	108	3911946	88588	pass
SAMN25516759	RT78	11		npmA2	Human	Human	Homo sapiens; Human infection	2015	11	8	Europe	United Kingdom				PRJNA762697	SRR17631102	Moore2022	129	3935997	72591	pass
SAMN25516838	RT78	11			Human	Human	Homo sapiens; Human infection				Europe	United Kingdom				PRJNA762697	SRR17631292	Moore2022	58	3876691	163472	pass
SAMN25516854	RT78	11			Human	Human	Homo sapiens; Human infection	2015	1	18	Europe	United Kingdom				PRJNA762697	SRR17631141	Moore2022	71	3950329	133756	pass
SAMN25516856	RT78	11		npmA2	Human	Human	Homo sapiens; Human infection				Europe	United Kingdom				PRJNA762697	SRR17631143	Moore2022	51	3962807	192864	pass
SAMN25516857	RT78	11			Human	Human	Homo sapiens; Human infection				Europe	United Kingdom				PRJNA762697	SRR17631144	Moore2022	47	3880317	187723	pass
SAMN25516859	RT78	11			Human	Human	Homo sapiens; Human infection				Europe	United Kingdom				PRJNA762697	SRR17631146	Moore2022	47	3871453	196074	pass
SAMN25516860	RT78	11			Human	Human	Homo sapiens; Human infection				Europe	United Kingdom				PRJNA762697	SRR17631147	Moore2022	56	3974504	195874	pass
SAMN25516982	RT78	11			Human	Human	Homo sapiens; Human infection				Europe	Ireland				PRJNA762697	SRR17631157	Moore2022	63	3924047	163571	pass
SAMN25516984	RT78	11			Human	Human	Homo sapiens; Human infection				Europe	United Kingdom				PRJNA762697	SRR17631159	Moore2022	44	3878337	228696	pass
SAMN25516990	RT78	11		npmA2	Human	Human	Homo sapiens; Human infection				Europe	United Kingdom				PRJNA762697	SRR17631165	Moore2022	50	3930705	163571	pass
SAMN25517000	RT78	11			Human	Human	Homo sapiens; Human infection				Europe	United Kingdom				PRJNA762697	SRR17631175	Moore2022	54	3841336	162131	pass
SAMN25516586	RT78	11		npmA2	Human	Human	Homo sapiens; Human infection				Europe	United Kingdom				PRJNA762697	SRR17631097	Moore2022	52	3962612	181671	pass
SAMN25516587	RT78	11			Human	Human	Homo sapiens; Human infection	2016	2	12	Europe	United Kingdom				PRJNA762697	SRR17631182	Moore2022	97	3871382	127065	pass
SAMN25516595	RT78	11			Human	Human	Homo sapiens; Human infection				Europe	United Kingdom				PRJNA762697	SRR17631190	Moore2022	51	3997706	192864	pass
SAMN19130031	HS-FS-000085	11			Human	Human	Homo sapiens; feces	2016	10	26	North America	United States	Arizona			PRJNA728705	SRR14526337	Williamson2023	45	3848355	229365	pass
SAMN19130128	HS-FS-000171	11			Human	Human	Homo sapiens; feces	2016	12	14	North America	United States	Arizona			PRJNA728705	SRR14526233	Williamson2023	42	3922208	258586	pass
SAMN17377960	MMMOSAM:c2a0c3df-1ff8-44bc-9590-31f32c0774d6	11			Human	Human	Homo sapiens; clinical sample	2012	11	10	Europe	Ireland				PRJNA692997	SRR13480808	Moloney2021	70	3923454	146038	pass
SAMN17377964	MMMOSAM:bbfcf8ba-03c7-4ca1-8689-e45de275f0bc	11			Human	Human	Homo sapiens; clinical sample	2016	4	27	Europe	Ireland				PRJNA692997	SRR13480812	Moloney2021	69	3972981	140881	pass
SAMN17377965	MMMOSAM:b8d9a6f1-6c80-48f7-a3d6-667788f8f16a	11			Human	Human	Homo sapiens; clinical sample	2014	6	13	Europe	Ireland				PRJNA692997	SRR13480813	Moloney2021	117	3890657	128400	pass
SAMN17377967	MMMOSAM:b3407dfe-fbc7-456c-b398-e823973279d6	11			Livestock	Pig	Sus scrofa; Farm sample	2015	5	1	Europe	Ireland				PRJNA692997	SRR13480815	Moloney2021	126	3900777	70392	pass
SAMN17377968	MMMOSAM:aa3157af-9b93-4a4e-8ca6-ed766dafa904	11			Human	Human	Homo sapiens; clinical sample	2016	1	28	Europe	Ireland				PRJNA692997	SRR13480816	Moloney2021	69	3953309	163571	pass
SAMN17377979	MMMOSAM:920d5e72-d8a8-4932-8c7c-4a092602bb48	11			Livestock	Pig	Sus scrofa; Farm sample	2015	5	1	Europe	Ireland				PRJNA692997	SRR13480827	Moloney2021	139	3902302	59917	pass
SAMN17377980	MMMOSAM:90f65240-9b96-4b4a-8274-ab52ed16bce1	11			Human	Human	Homo sapiens; clinical sample	2016	8	8	Europe	Ireland				PRJNA692997	SRR13480828	Moloney2021	71	3954193	134157	pass
SAMN17377981	MMMOSAM:90b310b6-c644-4d95-9b23-6fbe29de2142	11			Human	Human	Homo sapiens; clinical sample	2015	12	10	Europe	Ireland				PRJNA692997	SRR13480829	Moloney2021	59	3874260	152818	pass
SAMN17377984	MMMOSAM:8b495a7c-6334-4cb4-a619-a14dbf286c5a	11			Livestock	Pig	Sus scrofa; Farm sample	2015	5	1	Europe	Ireland				PRJNA692997	SRR13480832	Moloney2021	176	3902022	52657	pass
SAMN17377992	MMMOSAM:6984ed08-7fe3-49b0-9bec-d6664b8dba6a	11			Human	Human	Homo sapiens; clinical sample	2016	2	6	Europe	Ireland				PRJNA692997	SRR13480840	Moloney2021	76	3952138	147432	pass
SAMN17377993	MMMOSAM:5e80534f-882e-4535-a668-229df35f0a64	11			Human	Human	Homo sapiens; clinical sample	2013	4	8	Europe	Ireland				PRJNA692997	SRR13480841	Moloney2021	89	3905915	90063	pass
SAMN17377994	MMMOSAM:5d5a744c-b97a-4979-9696-79779f9daa67	11			Human	Human	Homo sapiens; clinical sample	2012	12	22	Europe	Ireland				PRJNA692997	SRR13480842	Moloney2021	58	3920178	188924	pass
SAMN17377998	MMMOSAM:54181a0d-8938-4e36-befb-62dd32f2b253	11			Human	Human	Homo sapiens; clinical sample	2016	3	21	Europe	Ireland				PRJNA692997	SRR13480846	Moloney2021	114	3879184	73449	pass
SAMN17377999	MMMOSAM:4fbf1ee4-be89-4843-aa16-0339f1e1ecd6	11			Human	Human	Homo sapiens; clinical sample	2015	11	24	Europe	Ireland				PRJNA692997	SRR13480847	Moloney2021	96	3874056	101586	pass
SAMN17378001	MMMOSAM:4be4d0f8-2c6e-4a92-b538-b4d90b09d3be	11			Human	Human	Homo sapiens; clinical sample	2014	3	12	Europe	Ireland				PRJNA692997	SRR13480849	Moloney2021	77	3924126	141220	pass
SAMN17378003	MMMOSAM:3ebe0444-7c09-4b58-8f04-de4ff00f0a8e	11			Human	Human	Homo sapiens; clinical sample	2014	5	17	Europe	Ireland				PRJNA692997	SRR13480851	Moloney2021	82	3908589	147346	pass
SAMN17378017	MMMOSAM:05723b78-499d-436e-890c-64413ec5bfc6	11			Human	Human	Homo sapiens; clinical sample	2015	10	5	Europe	Ireland				PRJNA692997	SRR13480865	Moloney2021	80	3871528	134209	pass
SAMN17377950	MMMOSAM:f5dce08e-c799-4c9b-90df-4c79c2362a24	11			Human	Human	Homo sapiens; clinical sample	2013	12	10	Europe	Ireland				PRJNA692997	SRR13480871	Moloney2021	74	3921888	141022	pass
SAMN17377952	MMMOSAM:f22a1fd5-f9b3-4d46-b920-cf8bcccd3846	11			Human	Human	Homo sapiens; clinical sample	2016	1	22	Europe	Ireland				PRJNA692997	SRR13480873	Moloney2021	69	3875728	128501	pass
SAMN17377956	MMMOSAM:d9a25aca-d9e8-4d31-b7e2-dc9212544fdb	11			Human	Human	Homo sapiens; clinical sample	2014	6	19	Europe	Ireland				PRJNA692997	SRR13480877	Moloney2021	87	3869652	106226	pass
SAMN35987594	2023EL-00669	11		npmA2	Human	Human	Homo sapiens; stool	2021			North America	United States				PRJNA629351	SRR25024037	Gargis2023	72	4089278	162797	pass
CLO_GA0355AA_AS	V22400774	11	78															no_study	70	3995069	141672	pass
CLO_GA0372AA_AS	V22400566	11	193															no_study	69	3912502	147345	pass
CLO_GA0375AA_AS	V23400419	11	78															no_study	63	3869143	141088	pass
CLO_GA0378AA_AS	V23400407	11	78															no_study	71	3877070	147345	pass
SAMN37183824	2023EL-00910	11			Human	Human	Homo sapiens; stool	2021			North America	United States				PRJNA629351	SRR25778853	Gargis2023	56	3871699	162796	pass
SAMN37183764	2023EL-00847	11		npmA2	Human	Human	Homo sapiens; stool	2021			North America	United States				PRJNA629351	SRR25778919	Gargis2023	72	4081069	162796	pass
CLO_GA0835AA_AS	V22400638By	11	78															no_study	63	3954323	147914	pass
CLO_GA0845AA_AS	V22400777By	11	126															no_study	66	4085090	152818	pass
SAMEA1710423	B1_5	11			Livestock	Pig	feces	2011			Europe	Netherlands				PRJEB3012		Knetsch2014	77	3973216	125575	pass
SAMEA1710479	078NET004	11			Human	Human		2007			Oceania	Australia				PRJEB3012		Knetsch2014	77	3979010	125575	pass
SAMEA1710525	78.6	11			Human	Human		2008			Europe	United Kingdom	Lincolnshire			PRJEB3012		Knetsch2014	69	3871768	145643	pass
SAMEA1710652	MON029	11									Oceania	Australia				PRJEB3012		Knetsch2014	76	3981434	119796	pass
SAMEA1710766	078LVP023	11			Human	Human		2011			Europe	United Kingdom	Liverpool			PRJEB3012		Knetsch2014	70	3949722	135537	pass
SAMEA1710787	078GUE001	11			Human	Human		2005			North America	Canada	Ontario			PRJEB3012		Knetsch2014	95	4064364	140761	pass
SAMEA1710827	649	11		npmA2	Livestock	Pig		2001			North America	United States	Iowa			PRJEB3012		Knetsch2014	64	3890026	140761	pass
SAMEA4726316		11			Human	Human										PRJEB25682		no_study	79	3867035	108718	pass
SAMEA742880	Bel018	11									Europe	United Kingdom				PRJEB2103		no_study	66	3855200	133892	pass
SAMN04458511	Symptomatic Infection 1295	11			Human	Human	feces	2011	6	5	Europe	United Kingdom		Oxfordshire		PRJNA304087		Dingle2019	65	3860602	141844	pass
SAMN04459334	Symptomatic Infection 2592	11			Human	Human	feces	2011	6	25	Europe	United Kingdom	Leeds			PRJNA304087		Dingle2019	63	3857974	140855	pass
SAMN04459378	Symptomatic Infection 2636	11			Human	Human	feces	2012	9	7	Europe	United Kingdom	Leeds			PRJNA304087		Dingle2019	52	4040690	163616	pass
SAMN04459932	Symptomatic Infection 3199	11			Human	Human	feces	2011	6	7	Europe	United Kingdom		Oxfordshire		PRJNA304087		Dingle2019	207	7583253	93849	fail
SAMN04460936	Asymptomatic infection 75	11			Human	Human	feces	2012	4	4	Europe	United Kingdom		Oxfordshire		PRJNA304087		Dingle2019	166	6788411	112160	fail
SAMN04848497	DOH6/22	11			Human	Human	clinical sample	2011	6	25	Europe	United Kingdom	Leeds			PRJNA317528		Martin2018	63	3857974	140855	pass
SAMN05209169	L32489	11			Human	Human	clinical sample	2011	6	5	Europe	United Kingdom		Oxfordshire		PRJNA318370		Stoesser2017	66	3860829	125575	pass
SAMN07609972	2ff30790-a135-4e41-adbf-9601284a727d	11			Human	Human	clinical sample	2014	3	2	Europe	United Kingdom				PRJNA369188		Eyre2017	108	3911747	77451	pass
SAMN07610105	094a71fa-ab84-4f29-8623-895d3246a813	11			Human	Human	clinical sample	2014	2	24	Europe	United Kingdom				PRJNA369188		Eyre2017	243	4019408	28904	fail
SAMEA1710594	078NET012	11			Human	Human	not available	2009			Europe	Hungary			Szeged	PRJEB3012		Knetsch2014	60	3940605	147255	pass
SAMEA1710335	S27	11			Livestock	Cow	not available	2010			Europe	Belgium				PRJEB3012		Knetsch2014	69	4121371	140829	pass
SAMEA1710410	078NET040	11			Human	Human	feces	2008			Europe	Netherlands				PRJEB3012		Knetsch2014	68	3937880	147254	pass
SAMN16927929	CD4401	11			Human	Human	Homo Sapiens	2014			Europe	United Kingdom	Nottinghamshire			PRJNA680994		no_study	1	4004108	4004108	pass
SAMEA5843194		11			Human	Human	stool sample	2013			Europe	Germany				PRJEB33779	ERR3465373	Frentrup2020	124	3903880	67283	pass
SAMEA5555950		11			Human	Human	Human faeces	2015	10	2	Europe	Spain				PRJEB28391	ERR3278165	Garcia-fernandez2019	89	4299146	111509	pass
SAMEA5846675		11			Livestock	Pig	rectal swab	2012			Europe	Germany				PRJEB33780	ERR3465636	Frentrup2020	93	4089064	111810	pass
SAMEA5846648		11			Livestock	Pig	rectal swab	2012			Europe	Germany				PRJEB33780	ERR3465660	Frentrup2020	84	4065282	125338	pass
SAMEA5846605		11			Livestock	Pig	rectal swab	2012			Europe	Germany				PRJEB33780	ERR3465724	Frentrup2020	94	4060462	108771	pass
SAMEA5849304	CD-16-00073	11	126		Human	Human	stool sample				Europe	Germany				PRJEB33866	ERR3473911	Frentrup2021	101	3997940	81148	pass
SAMN06675517	ST11	11			Human	Human	Faecal	2014	4	24	Europe	United Kingdom	Scotland			PRJNA381384	SRR5410514	Dingle2019	49	4077133	164543	pass
SAMN06675513	ST11	11			Human	Human	Faecal	2014	4	24	Europe	United Kingdom	Scotland			PRJNA381384	SRR5410518	Dingle2019	48	4027698	188007	pass
SAMN20110081	2021EL-00454	11			Human	Human	stool	2015			North America	United States				PRJNA629351		Gargis2023	106	4064304	72698	pass
SAMN22636055	192636823	11		npmA2	Human	Human		2019	7	25	Asia	China				PRJNA686004		Wen2022	46	4005033	165500	pass
SAMN14371792	TW7	11			Wildlife	Wild boar	feces	2012	3	25	Asia	Taiwan				PRJNA612412		no_study	57	3898800	133880	pass
SAMN31426486	2022EL-00924	11			Human	Human	stool	2020			North America	United States				PRJNA629351		Gargis2023	45	3911735	163738	pass
SAMN31945778	MCA6	11			Livestock	Sheep		2021	6	8	Europe	United Kingdom				PRJNA907009		no_study	176	3966394	303239	pass
SAMN31945762	T322	11					Supermarket/Coleslaw	2021	6	8	Europe	Ireland				PRJNA907009		no_study	146	3894545	201956	pass
SAMN31945763	T89	11					Sheep/Soil	2021	6	8	Europe	Ireland				PRJNA907009		no_study	139	4084552	210378	pass
SAMN31945760	T224	11					Poultry/Soil	2021	6	8	Europe	Ireland				PRJNA907009		no_study	148	3895608	201956	pass
SAMN31945758	T499	11					Poultry/Soil	2021	6	8	Europe	Ireland				PRJNA907009		no_study	140	3901499	417673	pass
SAMN31945754	T254	11					Sheep/Prechilling	2021	6	8	Europe	Ireland				PRJNA907009		no_study	143	3891000	250874	pass
SAMN31945757	T479	11			Livestock	Poultry	feces	2021	6	8	Europe	Ireland				PRJNA907009		no_study	160	3992826	210383	pass
SAMN31945756	T319	11					Supermarket/Cottage cheese	2021	6	8	Europe	Ireland				PRJNA907009		no_study	136	3883400	167441	pass
SAMN31945753	T51	11					Cattle/Water	2021	6	8	Europe	Ireland				PRJNA907009		no_study	220	3977879	250783	fail
SAMN31945750	T222	11					Poultry/Soil	2021	6	8	Europe	Ireland				PRJNA907009		no_study	135	3988029	201956	pass
SAMN31945746	T216	11						2021	6	8	Europe	Ireland				PRJNA907009		no_study	132	3880114	201956	pass
SAMN31945744	T501	11					Poultry/Soil	2021	6	8	Europe	Ireland				PRJNA907009		no_study	142	3905538	259015	pass
SAMN31945743	T48	11					Cattle/Water	2021	6	8	Europe	Ireland				PRJNA907009		no_study	142	3952945	214963	pass
SAMN31945740	T497	11					Poultry/Soil	2021	6	8	Europe	Ireland				PRJNA907009		no_study	108	3976857	303332	pass
SAMN31945739	T496	11					Poultry/Soil	2021	6	8	Europe	Ireland				PRJNA907009		no_study	126	3895256	250578	pass
SAMN31945736	T92	11					Sheep/Soil	2021	6	8	Europe	Ireland				PRJNA907009		no_study	114	3933385	227419	pass
SAMN31945734	T63	11			Livestock	sheep	feces	2021	6	8	Europe	Ireland				PRJNA907009		no_study	135	4019194	163633	pass
SAMN31945730	T18	11			Livestock	Cow	feces	2021	6	8	Europe	Ireland				PRJNA907009		no_study	132	3908499	201956	pass
SAMN31945733	T49	11					Cattle/Water	2021	6	8	Europe	Ireland				PRJNA907009		no_study	97	3928433	279198	pass
SAMN31945732	T44	11					Cattle/Soil	2021	6	8	Europe	Ireland				PRJNA907009		no_study	99	3933158	313636	pass
SAMN31945724	T47	11					Cattle/Water	2021	6	8	Europe	Ireland				PRJNA907009		no_study	107	3937666	250743	pass
SAMN31945725	T87	11					Sheep/Soil	2021	6	8	Europe	Ireland				PRJNA907009		no_study	113	4075959	277557	pass
SAMN31945728	B-AR6	11			Livestock	Pig		2021	6	8	Europe	United Kingdom				PRJNA907009		no_study	139	3882431	201956	pass
SAMN31945723	T46	11					Cattle/Water	2021	6	8	Europe	Ireland				PRJNA907009		no_study	134	3937367	297967	pass
SAMN31945722	T41	11					Cattle/Soil	2021	6	8	Europe	Ireland				PRJNA907009		no_study	141	3935755	213343	pass
SAMN31945721	T29	11					Cattle/Soil	2021	6	8	Europe	Ireland				PRJNA907009		no_study	122	3939773	250913	pass
SAMN31945718	T45	11					Cattle/Water	2021	6	8	Europe	Ireland				PRJNA907009		no_study	125	3931182	187724	pass
SAMN31945717	T220	11					Poultry/Soil	2021	6	8	Europe	Ireland				PRJNA907009		no_study	120	3902644	201956	pass
SAMN31945704	3632	11		npmA2	Human	Human		2021	6	8	Europe	United Kingdom				PRJNA907009		no_study	182	4026702	201956	pass
SAMN31945715	T169	11					Sheep/Water	2021	6	8	Europe	Ireland				PRJNA907009		no_study	112	3873058	228741	pass
SAMN31945699	MCA11	11			Livestock	Cow		2021	6	8	Europe	United Kingdom				PRJNA907009		no_study	116	3879701	187586	pass
SAMN31945696	MCA8	11			Livestock	Cow		2021	6	8	Europe	United Kingdom				PRJNA907009		no_study	140	3900800	196032	pass
SAMN31945711	T105	11					Cattle/Soil	2021	6	8	Europe	Ireland				PRJNA907009		no_study	115	4067821	194626	pass
SAMN31945708	T37	11					Cattle/Soil	2021	6	8	Europe	Ireland				PRJNA907009		no_study	143	3883603	164562	pass
SAMN31945710	T90	11					Sheep/Soil	2021	6	8	Europe	Ireland				PRJNA907009		no_study	103	3930792	298537	pass
SAMN31945706	V15401058	11			Human	Human		2021	6	8	Europe	United Kingdom				PRJNA907009		no_study	124	3939645	201956	pass
SAMN31945707	V15401059	11			Human	Human		2021	6	8	Europe	United Kingdom				PRJNA907009		no_study	138	3939079	227419	pass
SAMN31945703	MCA16	11			Livestock	Cow		2021	6	8	Europe	United Kingdom				PRJNA907009		no_study	159	3982947	313636	pass
SAMN31945702	MCA15	11			Livestock	Cow		2021	6	8	Europe	United Kingdom				PRJNA907009		no_study	125	3914916	303239	pass
SAMN31945705	V15090445	11			Human	Human		2021	6	8	Europe	United Kingdom				PRJNA907009		no_study	135	3922429	270598	pass
SAMN31945700	MCA12	11			Livestock	Sheep		2021	6	8	Europe	United Kingdom				PRJNA907009		no_study	116	3901533	202642	pass
SAMN31945698	MCA10	11			Livestock	Cow		2021	6	8	Europe	United Kingdom				PRJNA907009		no_study	110	3906111	202171	pass
SAMN31945697	MCA9	11			Livestock	Cow		2021	6	8	Europe	United Kingdom				PRJNA907009		no_study	145	4020485	164214	pass
SAMN31945695	MCA2	11			Livestock	Cow		2021	6	8	Europe	United Kingdom				PRJNA907009		no_study	113	3989671	398939	pass
SAMN31945694	MCA1	11			Livestock	Sheep		2021	6	8	Europe	United Kingdom				PRJNA907009		no_study	159	4009859	201956	pass
SAMN25516562	RT78	11			Human	Human	Human infection				Europe	United Kingdom				PRJNA762697	SRR17631073	Moore2022	42	4143410	210659	pass
SAMN25516585	RT78	11			Human	Human	Human infection				Europe	United Kingdom				PRJNA762697	SRR17631096	Moore2022	49	4035177	163239	pass
SAMN38049348	126	11			Livestock	Cow	feces	2021			Europe	Netherlands				PRJNA1034018	SRR26595236	no_study	74	4291424	133732	pass
SAMN38049343	78	11			Livestock	Cow	feces	2021			Europe	Netherlands				PRJNA1034018	SRR26595248	no_study	70	4309927	125339	pass
SAMN37224198	CF200	11		npmA2	Environment	Environment	environmental sample	2021			Europe	Germany				PRJNA1011814		Blau2023	4	4075860	3747232	pass
SAMN37224161	DS162	11			Environment	Environment	environmental sample	2022			Europe	Germany				PRJNA1011814		Blau2023	3	3991223	3931262	pass
SAMN37224131	CF97	11		npmA2	Environment	Environment	environmental sample	2021			Europe	Germany				PRJNA1011814		Blau2023	4	4091827	2270211	pass
SAMN37224109	CF99	11		npmA2	Environment	Environment	environmental sample	2021			Europe	Germany				PRJNA1011814		Blau2023	4	4083590	4018753	pass
SAMN37224108	CF95	11		npmA2	Environment	Environment	environmental sample	2021			Europe	Germany				PRJNA1011814		Blau2023	3	4053907	4031448	pass
SAMN37224103	CF87	11		npmA2	Environment	Environment	environmental sample	2021			Europe	Germany				PRJNA1011814		Blau2023	3	4078612	3236401	pass
SAMN37224101	CF85	11		npmA2	Environment	Environment	environmental sample	2021			Europe	Germany				PRJNA1011814		Blau2023	5	4084188	4011181	pass
SAMN37224100	CF84	11		npmA2	Environment	Environment	environmental sample	2021			Europe	Germany				PRJNA1011814		Blau2023	2	4073728	3841893	pass
SAMN37224098	CF82	11		npmA2	Environment	Environment	environmental sample	2021			Europe	Germany				PRJNA1011814		Blau2023	6	4106062	4016009	pass
CLO_FA2744AA_AS	SMG-21-1878	11	78		Human	Human		2021	7		Europe	United Kingdom	Scotland					no_study	128	3894709	76498	pass
CLO_FA2939AA_AS	SMG-21-2008	11	78		Human	Human		2021	11		Europe	United Kingdom	Scotland					no_study	78	3954673	141030	pass
CLO_FA6130AA_AS	SMG-22-2170	11	126		Human	Human		2022	11		Europe	United Kingdom	Scotland					no_study	136	4191516	119984	pass
CLO_FA6181AA_AS	SMG-22-2266	11	78		Human	Human					Europe	United Kingdom	Scotland					no_study	122	4121967	140881	pass
CLO_GA0848AA_AS	V22400652By	11	78															no_study	71	3985919	140881	pass
SAMEA1571259	C00002870	11			Human	Human		2010	9	5	Europe	United Kingdom				PRJEB3093		Didelot2012	125	3962441	63154	pass
SAMEA1710582	NET012-sc-2012-12-18T14:47:18Z-1528832	11			Livestock	Pig		2011			Europe	Netherlands				PRJEB3012		Knetsch2014	62	3961663	142135	pass
SAMEA1710603	MON035-sc-2012-11-09T13:36:54Z-1510486	11									Oceania	Australia				PRJEB3012		Knetsch2014	58	3944581	140804	pass
SAMEA1710700	NET011-sc-2012-12-18T14:47:17Z-1528831	11			Human	Human		2011			Europe	Netherlands				PRJEB3012		Knetsch2014	61	4036063	140805	pass
SAMEA1710707	LEI020-sc-2012-11-09T13:38:22Z-1510576	11														PRJEB3012		Knetsch2014	67	3981005	141114	pass
SAMEA1710784	078_LVP_022-sc-2012-05-10T19:53:21Z-1415636	11			Human	Human		2011			Europe	United Kingdom				PRJEB3012		Knetsch2014	58	3934582	140781	pass
SAMEA2187625	C00008274	11														PRJEB4556		Dubois2016	54	3982217	148510	pass
SAMEA2240604	C00007721	11			Human	Human					Europe	United Kingdom				PRJEB4640		Eyre2013	56	3964491	141487	pass
SAMEA2240626	C00007745	11			Human	Human					Europe	United Kingdom				PRJEB4640		Eyre2013	57	3976707	134348	pass
SAMEA2240715	C00007757	11			Human	Human					Europe	United Kingdom				PRJEB4640		Eyre2013	54	3976673	142459	pass
SAMEA2240751	C00008476	11			Human	Human					Europe	United Kingdom				PRJEB4640		Eyre2013	54	3980403	142021	pass
SAMEA3108506	NHCD0006-sc-2164177	11														PRJEB7830		no_study	65	3896697	139861	pass
SAMEA3108515	NHCD0015-sc-2164186	11														PRJEB7830		no_study	66	3895976	141996	pass
SAMEA3108516	NHCD0016-sc-2164187	11														PRJEB7830		no_study	64	3894815	139920	pass
SAMEA3108517	NHCD0017-sc-2164188	11														PRJEB7830		no_study	68	3894963	139639	pass
SAMEA3108519	NHCD0019-sc-2164190	11														PRJEB7830		no_study	67	3897903	142227	pass
SAMEA3108520	NHCD0020-sc-2164191	11														PRJEB7830		no_study	66	3894245	139861	pass
SAMEA3108521	NHCD0021-sc-2164192	11														PRJEB7830		no_study	63	3899317	139719	pass
SAMEA3108522	NHCD0022-sc-2164193	11			Human	Human					Europe	Netherlands				PRJEB25045		Crobach2023	62	3900379	142441	pass
SAMEA4744707	9eb6619a-155a-11e8-899b-3c4a9275d6c8	11														PRJEB25682		no_study	49	3960190	163571	pass
SAMEA4893819	80cfa038-291e-11e8-9200-3c4a9275d6c8	11														PRJEB25682		no_study	45	3924051	196453	pass
SAMEA4893846	8254107e-291e-11e8-9200-3c4a9275d6c8	11														PRJEB22563		Knight2019	43	3923269	196453	pass
SAMEA5086542	C002	11			Human	Human		2011	5	1	Oceania	Australia				PRJEB22563		Knight2019	69	4006397	134081	pass
SAMEA5086665	C127	11			Human	Human		2011	12	1	Oceania	Australia				PRJEB33779		Frentrup2020	64	3946383	125602	pass
SAMEA5843029	CD-16-00185	11			Human	Human		2016			Europe	Germany				PRJEB33779		Frentrup2020	70	4097570	119854	pass
SAMEA5843042	CD-16-00166	11			Human	Human		2015			Europe	Germany				PRJEB33779		Frentrup2020	52	3998212	141173	pass
SAMEA5843162	CD-15-00730	11			Human	Human		2014			Europe	Germany				PRJEB33780		Frentrup2020	112	4143964	81420	pass
SAMEA5846546	CD-18-00560	11			Livestock	Pig		2012			Europe	Germany				PRJEB33780		Frentrup2020	69	4038513	125726	pass
SAMEA5846594	CD-18-00482	11			Livestock	Pig		2012			Europe	Germany				PRJEB33780		Frentrup2020	70	3990114	106703	pass
SAMEA5846602	CD-18-00474	11			Livestock	Pig		2012			Europe	Germany				PRJEB33780		Frentrup2020	70	3987173	118807	pass
SAMEA5846620	CD-18-00456	11			Livestock	Pig		2012			Europe	Germany				PRJEB33780		Frentrup2020	69	3931653	141127	pass
SAMEA5846622	CD-18-00454	11			Livestock	Pig		2012			Europe	Germany				PRJEB33780		Frentrup2020	64	3930541	112129	pass
SAMEA5846623	CD-18-00453	11			Livestock	Pig		2012			Europe	Germany				PRJEB33780		Frentrup2020	62	3934944	133974	pass
SAMEA5846624	CD-18-00452	11			Livestock	Pig		2012			Europe	Germany				PRJEB33780		Frentrup2020	59	3938209	140873	pass
SAMEA5846628	CD-18-00448	11			Livestock	Pig		2012			Europe	Germany				PRJEB33780		Frentrup2020	63	3935122	141424	pass
SAMEA5846630	CD-18-00446	11			Livestock	Pig		2012			Europe	Germany				PRJEB33780		Frentrup2020	65	3990620	133978	pass
SAMEA5846632	CD-18-00444	11			Livestock	Pig		2012			Europe	Germany				PRJEB33780		Frentrup2020	68	3996886	120063	pass
SAMEA5846634	CD-18-00442	11			Livestock	Pig		2012			Europe	Germany				PRJEB33780		Frentrup2020	59	3997334	138658	pass
SAMEA5846637	CD-18-00439	11			Livestock	Pig		2012			Europe	Germany				PRJEB33780		Frentrup2020	65	3994979	112232	pass
SAMEA5846638	CD-18-00438	11			Livestock	Pig		2012			Europe	Germany				PRJEB33780		Frentrup2020	73	3995326	112089	pass
SAMEA5846639	CD-18-00437	11			Livestock	Pig		2012			Europe	Germany				PRJEB33780		Frentrup2020	61	3989663	135715	pass
SAMEA5846640	CD-18-00436	11			Livestock	Pig		2012			Europe	Germany				PRJEB33780		Frentrup2020	55	3989555	140869	pass
SAMEA5846641	CD-18-00435	11			Livestock	Pig		2012			Europe	Germany				PRJEB33780		Frentrup2020	60	3988975	133744	pass
SAMEA5846644	CD-18-00432	11			Livestock	Pig		2012			Europe	Germany				PRJEB33780		Frentrup2020	68	3988900	128368	pass
SAMEA5846645	CD-18-00431	11			Livestock	Pig		2012			Europe	Germany				PRJEB33780		Frentrup2020	52	3989574	147828	pass
SAMEA5846647	CD-18-00429	11			Livestock	Pig		2012			Europe	Germany				PRJEB33780		Frentrup2020	63	3998013	138672	pass
SAMEA5846649	CD-18-00427	11			Livestock	Pig		2012			Europe	Germany				PRJEB33780		Frentrup2020	58	3998074	134061	pass
SAMEA5846650	CD-18-00426	11			Livestock	Pig		2012			Europe	Germany				PRJEB33780		Frentrup2020	58	3988438	134141	pass
SAMEA5846670	CD-18-00367	11			Livestock	Pig		2012			Europe	Germany				PRJEB33780		Frentrup2020	61	4039384	134570	pass
SAMEA5846678	CD-18-00359	11			Livestock	Pig		2012			Europe	Germany				PRJEB33780		Frentrup2020	61	3933669	135749	pass
SAMEA5846679	CD-18-00358	11			Livestock	Pig		2012			Europe	Germany				PRJEB33780		Frentrup2020	66	3935700	136509	pass
SAMEA5846680	CD-18-00357	11			Livestock	Pig		2012			Europe	Germany				PRJEB33780		Frentrup2020	61	3931455	140985	pass
SAMEA5846683	CD-18-00354	11			Livestock	Pig		2012			Europe	Germany				PRJEB33780		Frentrup2020	60	3933226	135693	pass
SAMEA5846712	CD-18-00322	11			Livestock	Pig		2012			Europe	Germany				PRJEB33780		Frentrup2020	74	4039673	134145	pass
SAMEA5849409	08-00454	11			Human	Human		2008			Europe	Germany				PRJEB33868		Frentrup2021	55	3918230	147345	pass
SAMEA8389077	303136-18	11			Human	Human		2018	6		Europe	Switzerland				PRJEB43401		Seth-Smith2021	47	3951448	163571	pass
SAMN04458506	Symptomatic Infection 1275	11			Human	Human	Faeces	2010	5	9	Europe	United Kingdom		Oxfordshire		PRJNA304087		Dingle2019	60	3957846	140805	pass
SAMN04459375	Symptomatic Infection 2633	11			Human	Human	Faeces	2012	7	22	Europe	United Kingdom			Leeds	PRJNA304087		Dingle2019	104	4176480	125608	pass
SAMN06579271	ST11	11			Human	Human		2014	4	24	Europe	United Kingdom	Glasgow			PRJNA379066		no_study	44	3967225	188623	pass
SAMN06675472	ST11	11			Human	Human		2014	4	24	Europe	United Kingdom	Scotland			PRJNA381384		Dingle2019	44	3967225	188623	pass
SAMN06675508	ST11	11			Human	Human		2014	4	24	Europe	United Kingdom	Scotland			PRJNA381384		Dingle2019	43	3986347	164253	pass
SAMN06675511	ST11	11			Human	Human		2014	4	24	Europe	United Kingdom	Scotland			PRJNA381384		Dingle2019	38	3988255	189070	pass
SAMN06675524	ST11	11			Human	Human		2014	4	24	Europe	United Kingdom	Scotland			PRJNA381384		Dingle2019	44	3987518	164249	pass
SAMN13566205	not applicable	11			Human	Human					North America	United States	New York			PRJNA595724		Miles-Jay2021	58	3938090	139759	pass
SAMN13738873	D17-MD174	11			Environment	Livestock manure		2017			Europe	France				PRJNA599117		Maréchal2020	64	3994044	125626	pass
SAMN13738874	D17-MD178	11			Environment	Livestock manure		2017			Europe	France				PRJNA599117		Maréchal2020	62	3993649	125547	pass
SAMN17377975	NA	11			Human	Human		2014	4	28	Europe	Ireland				PRJNA692997		Moloney2021	52	3871452	140881	pass
SAMN22224107	2021EL-01237	11			Human	Human		2019			North America	United States				PRJNA629351		Gargis2023	115	3839484	68015	pass
SAMN25517024	RT78	11			Human	Human					Europe	United Kingdom				PRJNA762697		Moore2022	40	3954017	229708	pass
SAMN29256741	NA	11			Human	Human		2010	8	22	Europe	United Kingdom				PRJNA318370		Stoesser2017	53	3950752	134039	pass
SAMN31426459	2022EL-00897	11			Human	Human		2020			North America	United States				PRJNA629351		Gargis2023	62	4042058	140808	pass
SAMN31945709	T38	11						2021	6	8	Europe	Ireland				PRJNA907009		no_study	53	3999586	187723	pass
SAMN35685281	2023EL-00516	11			Human	Human		2021			North America	United States				PRJNA629351		Gargis2023	41	3838635	164619	pass
SAMN37183769	2023EL-00853	11			Human	Human		2021			North America	United States				PRJNA629351		Gargis2023	56	4053367	141022	pass
SAMEA5846548	CD-18-00548	36	49	npmA2	Livestock	Pig	rectal swab	2012			Europe	Germany				PRJEB33780	ERR3465678	Schneeberg2013	51	4392333	208948	pass
SAMEA5846551	CD-18-00541	36	49	npmA2	Livestock	Pig	rectal swab	2012			Europe	Germany				PRJEB33780	ERR3465718	Schneeberg2013	60	4389108	138388	pass
SAMEA5846552	CD-18-00538	36	49	npmA2	Livestock	Pig	rectal swab	2012			Europe	Germany				PRJEB33780	ERR3465752	Schneeberg2013	47	4388659	208964	pass
SAMEA5846554	CD-18-00536	36	49	npmA2	Livestock	Pig	rectal swab	2012			Europe	Germany				PRJEB33780	ERR3465746	Schneeberg2013	70	4393218	129441	pass
SAMN02904009	7401255	36			Human	Human	faeces	2005	10	13	Europe	United Kingdom	England	North Yorkshire	Scarborough	PRJNA248340	SRR1519378	Knetsch2012	31	4331347	291427	pass
SAMN05209639	ECDC-011	36			Human	Human	clinical				Europe	United Kingdom	England		Leeds	PRJNA318370	SRR3631888	Stoesser2017	32	4327498	291393	pass
SAMEA110473649	SAT16-157	54			Human	Human	Homo sapiens; human feces	2016			Europe	France				PRJEB54703	ERR10039385	Courbin2022	79	4273123	214217	pass
SAMEA112130454	cdifficile_38629	54			Human	Human	Homo Sapiens; Stool	2021	1	14	Europe	Switzerland				PRJEB56399	ERR10483913	Filippidis2023	83	4435674	179281	pass
SAMEA112130455	cdifficile_38630	54			Human	Human	Homo Sapiens; Stool	2021	2	5	Europe	Switzerland				PRJEB56399	ERR10483914	Filippidis2023	75	4435049	278610	pass
SAMEA1402388	clo10	54									Europe	United Kingdom				PRJEB2101		no_study	78	4231416	182707	pass
SAMEA1571462	C00000528	54			Human	Human		2007			Europe	United Kingdom				PRJEB3093	ERR142185	Didelot2012	62	4213384	307754	pass
SAMEA1571474	C00000525	54			Human	Human		2007			Europe	United Kingdom				PRJEB3093	ERR142184	Didelot2012	62	4214447	262088	pass
SAMEA1571493	C00000532	54			Human	Human		2009			Europe	United Kingdom				PRJEB3093	ERR142187	Didelot2012	116	4260498	224693	pass
SAMEA1571503	C00000531	54			Human	Human					Europe	United Kingdom				PRJEB3093	ERR142186	Didelot2012	110	4254940	121670	pass
SAMEA1571513	C00000567	54			Human	Human		2006			Europe	United Kingdom				PRJEB3093	ERR142202	Didelot2012	86	4273564	226121	pass
SAMEA2052297	C00000483	54	12		Human	Human		2006			Europe	United Kingdom	Oxford			PRJEB1483	ERR232385	Dingle2014	116	4271628	125303	pass
SAMEA2070407	C00007647	54			Human	Human		2011			Europe	United Kingdom	Oxford			PRJEB1483	ERR272081	Dingle2014	75	4224172	231673	pass
SAMEA2239782		54			Human	Human		2012			Europe	United Kingdom				PRJEB4639		Eyre2013	95	4220722	108276	pass
SAMEA2240382	C00007659	54			Human	Human					Europe	United Kingdom				PRJEB4640	ERR347844	Eyre2013	76	4229000	245600	pass
SAMEA2820632	LD06-sc-1290423	54														PRJEB2318	ERR658296	no_study	99	4230711	227677	pass
SAMEA3312302	CD105HS1	54	12		Environment	Soil/Dust		2009			Europe	United Kingdom				PRJEB8943	ERR833660	Hargreaves2015	95	4273579	235657	pass
SAMEA4428080		54														PRJEB13566		no_study	75	4232369	182707	pass
SAMEA4744672	9a945c16-155a-11e8-899b-3c4a9275d6c8	54			Human	Human		2015			Europe	Netherlands			Rotterdam	PRJEB25045	ERR3284212	Crobach2023	67	4239242	498450	pass
SAMEA5843059	CD-16-00142	54	12		Human	Human	Homo sapiens; stool sample	2015			Europe	Germany				PRJEB33779	ERR3465574	Frentrup2020	99	4291715	161423	pass
SAMEA8389098		54			Human	Human		2018	8		Europe	Switzerland				PRJEB43401		Seth-Smith2021	56	4757895	215548	fail
SAMEA897004	HK034	54									Asia	China				PRJEB2318		no_study	38	4228659	226036	pass
SAMN04458744	Symptomatic Infection 1895	54			Human	Human	Homo sapiens; Faeces; feces	2011	12	5	Europe	United Kingdom	England	Oxfordshire		PRJNA304087	SRR3338634	Dingle2019	73	4309498	261987	pass
SAMN04458746	Symptomatic Infection 1897	54			Human	Human	Homo sapiens; Faeces; feces	2012	2	20	Europe	United Kingdom	England	Oxfordshire		PRJNA304087	SRR3338745	Dingle2019	81	4183738	262196	pass
SAMN04459730	Symptomatic Infection 2977	54			Human	Human	Homo sapiens; Faeces; feces	2011	9	26	Europe	United Kingdom	England		Leeds	PRJNA304087	SRR3335162	Dingle2019	71	4291235	296481	pass
SAMN04459732	Symptomatic Infection 2979	54			Human	Human	Homo sapiens; Faeces; feces	2011	12	21	Europe	United Kingdom	England		Leeds	PRJNA304087	SRR3337674	Dingle2019	114	4279538	213816	pass
SAMN04459737	Symptomatic Infection 2984	54			Human	Human	Homo sapiens; Faeces; feces	2012	6	29	Europe	United Kingdom	England		Leeds	PRJNA304087	SRR3334871	Dingle2019	70	4274962	307867	pass
SAMN04460127	Symptomatic Infection 3396	54			Human	Human	Faeces	2012	4	28	Europe	United Kingdom	Oxfordshire			PRJNA304087		Dingle2017	71	4217548	195128	pass
SAMN04460749	Symptomatic Infection 4100	54			Human	Human	Homo sapiens; Faeces; feces	2008	3	11	North America	Canada				PRJNA304087	SRR3340077	Dingle2019	115	4311915	296656	pass
SAMN04460751	Symptomatic Infection 4102	54			Human	Human	Homo sapiens; Faeces; feces	2008	10	29	Europe	Germany				PRJNA304087	SRR3340186	Dingle2019	115	4413084	280370	pass
SAMN04460908	Asymptomatic infection 44	54			Human	Human	Homo sapiens; Faeces; feces	2013	3	24	Europe	United Kingdom	England	Oxfordshire		PRJNA304087	SRR3317185	Dingle2019	83	4228936	142781	pass
SAMN04461035	Asymptomatic infection 190	54			Human	Human	Homo sapiens; Faeces; feces	2012	1	7	Europe	United Kingdom	England	Oxfordshire		PRJNA304087	SRR3334434	Dingle2019	73	4204051	278625	pass
SAMN04825351	MMMOSAM:0cc7f8d3-f178-403e-8f16-cf0a2e29e908	54			Human	Human	Homo sapiens; clinical sample	2011	12	21	Europe	United Kingdom	England		Leeds	PRJNA317528	SRR3357620	Martin2018	114	4279538	213816	pass
SAMN04848445	MMMOSAM:a9dfd48e-f8eb-4de6-9348-c0755e49a8db	54			Human	Human	Homo sapiens; clinical sample	2011	9	26	Europe	United Kingdom	England		Leeds	PRJNA317528	SRR3355971	Martin2018	71	4291235	296481	pass
SAMN05207991	MMMOSAM:91628b70-ff31-4242-8b47-79b651a1fa36	54			Human	Human	Homo sapiens; clinical sample				Europe	United Kingdom	England		Leeds	PRJNA318370	SRR3629595	Stoesser2017	81	4292002	217192	pass
SAMN05208004	MMMOSAM:96f3a008-afa5-43a8-ad41-0ef19a05e18c	54			Human	Human	Homo sapiens; clinical sample				Europe	United Kingdom	England		Leeds	PRJNA318370	SRR3629609	Stoesser2017	85	4284117	296933	pass
SAMN05209145	MMMOSAM:121eb51c-ecf8-412e-ad63-ee42ffe84668	54		npmA1	Human	Human	Homo sapiens; clinical sample				Oceania	Australia				PRJNA318370	SRR3631166	Stoesser2017	80	4294656	288402	pass
SAMN05209617	MMMOSAM:d7ffef38-4c02-4034-b3ac-8814a91257ee	54			Human	Human	Homo sapiens; Study sample	2012	3	2	Europe	United Kingdom	England	Oxfordshire		PRJNA318370	SRR3631866	Stoesser2017	72	4205425	278625	pass
SAMN05209626	MMMOSAM:dccf4007-c821-4f84-9714-9d97d7ed3e50	54			Human	Human	Homo sapiens; Study sample	2012	1	26	Europe	United Kingdom	England	Oxfordshire		PRJNA318370	SRR3631875	Stoesser2017	81	4205724	246166	pass
SAMN05219390	MMMOSAM:94caeada-443d-4ad9-b946-995ea6e51893	54			Human	Human	Homo sapiens; Study sample	2011	3	4	Europe	United Kingdom	England	Oxfordshire		PRJNA318370	SRR3654513	Stoesser2017	83	4228936	142781	pass
SAMN06216594	630	54			Laboratory	Laboratory	in vitro	2015								PRJNA360250	SRR5169307	Caspers2017	84	4203419	149152	fail
SAMN06216596	630	54			Laboratory	Laboratory	in vitro	2015								PRJNA360250	SRR5169305	Caspers2017	71	4204246	193922	fail
SAMN07609276	MMMOSAM:e4b4dc79-9e0c-4167-a4c6-d998cdf8030b	54			Human	Human	Homo sapiens; clinical sample	2014	1	9	Europe	United Kingdom				PRJNA369188	SRR6009408	Eyre2017	102	4371548	194090	pass
SAMN07609334	MMMOSAM:d3bcc27e-5712-4b23-a1b7-6125b1907a46	54			Human	Human	Homo sapiens; clinical sample	2013	1	27	Europe	United Kingdom				PRJNA369188	SRR6009614	Eyre2017	86	4249806	195565	pass
SAMN07609607	MMMOSAM:89e7d0ec-9e23-4253-9fff-16f3d6c8d28c	54			Human	Human	Homo sapiens; clinical sample	2014	1	24	Europe	United Kingdom				PRJNA369188	SRR6009831	Eyre2017	75	4180118	213586	pass
SAMN07609763	MMMOSAM:632582be-f349-4f76-a864-3345cb5c965f	54			Human	Human	Homo sapiens; clinical sample	2013	5	23	Europe	United Kingdom				PRJNA369188	SRR6009341	Eyre2017	154	4176005	53763	pass
SAMN07610134	MMMOSAM:03242d61-b5e0-49a3-860f-6c0bf743e0e0	54			Human	Human	Homo sapiens; clinical sample	2014	7	3	Europe	United Kingdom				PRJNA369188	SRR6009845	Eyre2017	117	4230630	128744	pass
SAMN08464352	10061701	54			Human	Human	feces	2010	6		Asia	China	Hangzhou			PRJNA432876		Zheng2022	52	4221699	181697	pass
SAMN08464690	15071602	54			Human	Human	feces	2015	7		Asia	China	Hangzhou			PRJNA432876		Zheng2022	52	4220352	214228	pass
SAMN08464692	15072802	54			Human	Human	feces	2015	7		Asia	China	Hangzhou			PRJNA432876		Zheng2022	65	4290893	213713	pass
SAMN08464701	15101501	54			Human	Human	feces	2015	10		Asia	China	Hangzhou			PRJNA432876		Zheng2022	49	4300631	249684	pass
SAMN08464702	15110503	54			Human	Human	feces	2015	11		Asia	China	Hangzhou			PRJNA432876		Zheng2022	53	4224682	192766	pass
SAMN08464742	16060304	54			Human	Human	feces	2016	6		Asia	China	Hangzhou			PRJNA432876		Zheng2022	58	4371971	213835	pass
SAMN08464743	16060305	54			Human	Human	feces	2016	6		Asia	China	Hangzhou			PRJNA432876		Zheng2022	61	4369887	226206	pass
SAMN08464751	16070805	54			Human	Human	feces	2016	7		Asia	China	Hangzhou			PRJNA432876		Zheng2022	65	4283545	214228	pass
SAMN08464787	16102701	54			Human	Human	feces	2016	10		Asia	China	Hangzhou			PRJNA432876		Zheng2022	55	4302004	213713	pass
SAMN08464833	15042533ss	54			Human	Human	feces	2015	4		Asia	China	Hangzhou			PRJNA432876		Zheng2022	54	4270484	177337	pass
SAMN08464839	15050833ss	54			Human	Human	feces	2015	5		Asia	China	Hangzhou			PRJNA432876		Zheng2022	52	4270124	196714	pass
SAMN08464861	15063034ss	54			Human	Human	feces	2015	6		Asia	China	Hangzhou			PRJNA432876		Zheng2022	59	4270044	195117	pass
SAMN08464869	15072331ss	54			Human	Human	feces	2015	7		Asia	China	Hangzhou			PRJNA432876		Zheng2022	52	4268866	213854	pass
SAMN08464878	15081114ss	54			Human	Human	feces	2015	8		Asia	China	Hangzhou			PRJNA432876		Zheng2022	54	4270416	167755	pass
SAMN08464896	15101403ss	54			Human	Human	feces	2015	10		Asia	China	Hangzhou			PRJNA432876		Zheng2022	53	4270653	209803	pass
SAMN08464918	15122949ss	54			Human	Human	feces	2015	12		Asia	China	Hangzhou			PRJNA432876		Zheng2022	55	4270922	214228	pass
SAMN08464932	16021912ss	54			Human	Human	feces	2016	2		Asia	China	Hangzhou			PRJNA432876		Zheng2022	53	4270738	196768	pass
SAMN08832100	22457	54			Human	Human	Homo sapiens	2014			North America	United States				PRJNA224116		Haft2018	3	4361487	4336356	pass
SAMN08915544	WCHCD000031	54			Human	Human	Homo sapiens				Asia	China	Sichuan			PRJNA449640	SRR6986111	no_study	95	4327348	262087	pass
SAMN08915565	WCHCD000721	54			Human	Human	Homo sapiens	2017			Asia	China	Sichuan			PRJNA449640	SRR6986126	no_study	97	4293517	235722	pass
SAMN08915587	WCHCD065712	54			Human	Human	Homo sapiens	2017			Asia	China	Sichuan			PRJNA449640	SRR6986106	no_study	86	4286745	280386	pass
SAMN08915590	WCHCD000005	54			Human	Human	Homo sapiens	2017			Asia	China	Sichuan			PRJNA449640	SRR6986108	no_study	67	4229498	297047	pass
SAMN08915594	WCHCD000057	54			Human	Human	Homo sapiens	2016			Asia	China	Sichuan			PRJNA449640	SRR6986112	no_study	97	4326620	261824	pass
SAMN08915596	WCHCD000079	54		npmA2	Human	Human	Homo sapiens	2016			Asia	China	Sichuan			PRJNA449640	SRR6986153	Chen2017	88	4342270	280386	pass
SAMN09209243	WCHCD065012	54			Human	Human	Homo sapiens	2015	9	9	Asia	China	Sichuan			PRJNA449640	SRR7169718	no_study	104	4315741	261873	pass
SAMN09209252	WCHCD065144	54			Human	Human	Homo sapiens	2015	10	9	Asia	China	Sichuan			PRJNA449640	SRR7169723	no_study	98	4300232	261782	pass
SAMN09209256	WCHCD065190	54			Human	Human					Asia	China	Chengdu	Sichuan		PRJNA449640		Chen2017	57	4288424	249119	pass
SAMN09209259	WCHCD065291	54			Human	Human	Homo sapiens	2015	10	29	Asia	China	Sichuan			PRJNA449640	SRR7169710	no_study	66	4241758	297030	pass
SAMN09209266	WCHCD065537	54			Human	Human		2015	9	21	Asia	China	Chengdu	Sichuan		PRJNA449640		Chen2017	66	4281656	280354	pass
SAMN09233789	S001	54			Human	Human	Homo sapiens; Age: 61; male; stool specimen	2016	1	10	North America	United States	Texas	Harris County	Houston	PRJNA472399	SRR7192371	Norsigian2020	140	4339114	213874	pass
SAMN09400751	CD07969	54			Human	Human	Homo sapiens; stool	2017			North America	United States	Pennsylvania	Allegheny County	Pittsburgh	PRJNA475751	SRR7297439	Sundermann2022	136	4228288	72084	pass
SAMN09979725	S_2	54			Human	Human	Homo sapiens; Age: >65; feces	2015	11	12	Europe	United Kingdom	England	West Midlands Combined Authority	Birmingham	PRJNA490071	SRR7852210	Halstead2019	134	4383513	138003	pass
SAMN12606886	PSM023	54			Human	Human	Homo sapiens	2012			North America	United States	Michigan			PRJNA561087	SRR9997333	Miles-Jay2021	40	4192888	307553	pass
SAMN12606918	PSM059	54			Human	Human	Homo sapiens	2012			North America	United States	Michigan			PRJNA561087	SRR9997368	Miles-Jay2021	40	4229580	546841	pass
SAMN13639081	CIM-381	54			Human	Human	Homo sapiens; stool	2016			North America	United States				PRJNA590803	SRR10869496	no_study	59	4242425	283960	pass
SAMN13838772	PFECD0160	54			Human	Human	Homo sapiens; stool	2015								PRJNA600974	SRR10881464	Li2020	56	4270817	280386	pass
SAMN13838773	PFECD0519	54			Human	Human	Homo sapiens; stool	2015								PRJNA600974	SRR10881463	Li2020	51	4270306	280386	pass
SAMN15595017	HP5	54			Human	Human	asymptomatic patient	2018	11	1	Asia	China	Zhejiang			PRJNA647668		Zhou2021	45	4220825	259570	pass
SAMN15595048	HP37	54			Human	Human	asymptomatic patient	2019	8	1	Asia	China	Zhejiang			PRJNA647668		Zhou2021	102	4250173	231531	pass
SAMN15595057	HP46	54			Human	Human	asymptomatic patient	2018	11	1	Asia	China	Zhejiang			PRJNA647668		Zhou2021	38	4218094	296543	pass
SAMN15907356	M2016019478	54			Human	Human	Homo sapiens; Age: 25; female; stool	2016	10	13	North America	United States	New York	Monroe		PRJNA659471	SRR12520534	Pecora2022	71	4273085	261707	pass
SAMN15907410	M2016019793	54			Human	Human	Homo sapiens; Age: 61; female; stool	2016	11	1	North America	United States	New York	Monroe		PRJNA659471	SRR12520528	Pecora2022	61	4247262	290079	pass
SAMN17813390	MMMOSAM:f5eb1a64-90b4-425b-bf39-860e3e3f367d	54			Human	Human	Homo sapiens; clinical sample	2015	4	12	Europe	United Kingdom	Wales			PRJNA412541	SRR13642491	Eyre2019	64	4316013	303570	pass
SAMN18043731	SDLTF-9	54			Human	Human	feces	2013			Asia	China	Shandong			PRJNA704542		Wang2023	77	4245873	123678	pass
SAMN18043732	TAFY29	54			Human	Human	feces	2013			Asia	China	Shandong			PRJNA704542		Wang2023	73	4239665	148707	pass
SAMN18043741	A97	54			Human	Human	feces	2017	11		Asia	China	Shandong			PRJNA704542		Wang2023	32	4373829	245498	pass
SAMN18043748	A259	54			Human	Human	feces	2017	11		Asia	China	Shandong			PRJNA704542		Wang2023	39	4278032	226222	pass
SAMN19130042	HS-FS-000416-I-02	54		npmA2	Human	Human	Homo sapiens; feces	2018	6	29	North America	United States	Arizona			PRJNA728705	SRR14526326	Williamson2023	78	4362363	303136	pass
SAMN20110157	2021EL-00536	54			Human	Human	Homo sapiens; stool	2016			North America	United States				PRJNA629351	SRR15066375	Gargis2023	70	4272988	295652	pass
SAMN20110273	2021EL-00655	54			Human	Human	Homo sapiens; stool	2016			North America	United States				PRJNA629351	SRR15066182	Gargis2023	63	4246045	224391	pass
SAMN22635865	163566897	54			Human	Human		2016	12	26	Asia	China				PRJNA686004		Wen2022	49	4260851	249812	pass
SAMN22635873	171286139	54			Human	Human		2017	5	15	Asia	China				PRJNA686004		Wen2022	46	4258903	249218	pass
SAMN22635942	182385929	54			Human	Human		2018	8	1	Asia	China				PRJNA686004		Wen2022	33	4172351	307453	pass
SAMN22635944	182472929	54			Human	Human		2018	8	8	Asia	China				PRJNA686004		Wen2022	36	4168342	307453	pass
SAMN22635993	191087685	54			Human	Human		2019	3	30	Asia	China				PRJNA686004		Wen2022	46	4287230	249812	pass
SAMN22636023	192224857	54			Human	Human		2019	6	24	Asia	China				PRJNA686004		Wen2022	47	4289607	230630	pass
SAMN22636110	194637153	54			Human	Human		2019	12	16	Asia	China				PRJNA686004		Wen2022	35	4190712	307453	pass
SAMN22636128	200205692	54			Human	Human		2020	1	15	Asia	China				PRJNA686004		Wen2022	40	4249615	249218	pass
SAMN22636129	200218671	54			Human	Human		2020	1	16	Asia	China				PRJNA686004		Wen2022	31	4224244	295750	pass
SAMN25516963	RT12	54			Human	Human	Homo sapiens; Human infection	2011	9	26	Europe	United Kingdom				PRJNA762697	SRR17631333	Moore2022	48	4268017	278632	pass
SAMN26725124	2022EL-00186	54			Human	Human	Homo sapiens; stool	2014			North America	United States				PRJNA629351	SRR18338357	Gargis2023	67	4240525	262937	pass
SAMN29837226	Xy07	54			Human	Human	feces	2014	9		Asia	China	Kaifu District	Changsha		PRJNA860222		no_study	161	4172484	85074	pass
SAMN31139135	0000-0093-7489	54			Human	Human	Homo sapiens; Rectal swab	2022			North America	United States	Massachusetts	Suffolk County	Boston	PRJNA278886	SRR21787870	Nudel2018	86	4337921	307553	pass
SAMN32347322	2022EL-01072	54			Human	Human	Homo sapiens; stool	2020			North America	United States				PRJNA629351	SRR22845396	Gargis2023	55	4310632	312734	pass
SAMN32366269	L,16.7569767	54	12		Human	Human	Homo sapiens; feces				Europe	Portugal				PRJNA914992	SRR22862973	Olaitan2023	130	4234790	100287	pass
SAMN33341108	2023EL-00053	54		npmA2	Human	Human	Homo sapiens; stool	2021			North America	United States				PRJNA629351	SRR23510847	Gargis2023	87	4366105	227667	pass
SAMN33341169	2023EL-00114	54		npmA2	Human	Human	Homo sapiens; stool	2021			North America	United States				PRJNA629351	SRR23510812	Gargis2023	91	4369772	262029	pass
SAMN34409465	2023EL-00216	54		npmA2	Human	Human	Homo sapiens; stool	2019			North America	United States				PRJNA629351	SRR24326534	Gargis2023	100	4369971	261833	pass
SAMN34409487	2023EL-00238	54		npmA2	Human	Human	Homo sapiens; stool	2019			North America	United States				PRJNA629351	SRR24326509	Gargis2023	110	4368915	226944	pass
SAMN37183772	2023EL-00856	54		npmA2	Human	Human	Homo sapiens; stool	2021			North America	United States				PRJNA629351	SRR25778911	Gargis2023	101	4370399	298362	pass
SAMN37364961	CDIF_MRBA_32	54			Human	Human	Homo sapiens	2017			North America	United States	Illinois	Cook County	Chicago	PRJNA821830	SRR26061594	Miles-Jay2023	51	4281405	249109	pass
CLO_BA4142AA_AS	CD-15-00767	54			Human	Human		2011			Europe	Germany						no_study	201	4197616	46720	fail
CLO_EA6014AA_AS	SIRN_ST-023	54	12		Human	Human		2913			Europe	United Kingdom						no_study	39	4290797	398815	pass
CLO_FA2482AA_AS	SMG-21-1565	54	12		Human	Human		2021	8		Europe	United Kingdom						no_study	84	4285159	230538	pass
CLO_FA2497AA_AS	SMG-21-1605	54	12		Human	Human		2021	8		Europe	United Kingdom						no_study	87	4284411	214875	pass
SAMEA1571480	C00000524	54			Human	Human		2008	10	27	Europe	United Kingdom				PRJEB3093	ERS149894	Didelot2012	88	4221993	186141	pass
SAMEA2260045	C00009678	54														PRJEB4315	ERS373741	Lamble2013	37	4201741	304204	pass
SAMN05832941	69B1	54					stool	2012	8	14	North America	United States	California			PRJNA344770	SRS1717240	Sim2017	51	4304548	249151	pass
SAMN08464720	16021405	54			Human	Human	feces	2016	2		Asia	China	Hangzhou			PRJNA432876		Zheng2022	67	4270083	216184	pass
SAMN11021904	Cd6	54			Human	Human	feces	2016	4	8	North America	United States	Philadelphia	PA		PRJNA524299		Bushman2020	1	4321901	4321901	pass
SAMN15595013	HP1	54			Human	Human	asymptomatic patient	2018	7	1	Asia	China	Zhejiang			PRJNA647668		Zhou2021	72	4259056	226077	pass
SAMN18043646	ZR24	54			Human	Human	feces	2010			Asia	China	Beijing			PRJNA704542		Wang2023	85	4291831	192714	pass
SAMN19130116	HS-FS-000480-I-02	54			Human	Human	feces				North America	United States	Arizona			PRJNA728705	SRS8964819	Williamson2023	31	4260830	498774	pass
SAMN22635954	183896305	54			Human	Human		2018	12	3	Asia	China				PRJNA686004		Wen2022	37	4187089	216093	pass
SAMN22636033	192360623	54			Human	Human		2019	7	4	Asia	China				PRJNA686004		Wen2022	33	4213557	305590	pass
